# Supplementary material
Source: PubMed Central journal article supplement (PMC8371573)
Supplement: jama-e219907-s001.pdf [file jama-e219907-s001.pdf]

## Supplemental Online Content

Mahajan S, Caraballo C, Lu Y, et al. Trends in differences in health status and health care access and affordability by race and ethnicity in the United States, 1999-2018. *JAMA*. doi:10.1001/jama.2021.9907

**eMethods 1.** National Health Interview Survey Response Rates, 1999 to 2018

**eMethods 2.** Details of Assessment of Study Outcomes

**eMethods 3.** Details Describing How This Study Meets the Standards for Publishing on Racial Health Inequities

**eFigure 1.** Race and Ethnicity Distribution Among Adults in the US, National Health Interview Survey 1999-2018

**eFigure 2.** Trends in the Estimated Proportion of Individuals with Low Income Between 1999 and 2018, by Race and Ethnicity

**eFigure 3.** Adjusted Overall Trends in Self-Reported Health Status, Functional Limitation, and Severe Psychological Distress and in Health Care Access, Utilization, and Affordability Measures, 1999–2018

**eFigure 4.** Adjusted Trends of Self-Reported Poor/Fair Health Status, Functional Limitation, and Severe Psychological Distress by Race, Ethnicity, and Income, 1999–2018

**eFigure 5.** Adjusted Trends of Limitations in Physical Tasks and Social/Leisure Activities by Race and Ethnicity, 1999–2018

**eFigure 6.** Adjusted Trends of Self-Reported Health Care Access, Utilization, and Affordability Measures by Race, Ethnicity, and Income, 1999–2018

**eTable 1.** General Characteristics of the Study Population by Race and Ethnicity in 1999–2000, 2008–2009, and 2017–2018

**eTable 2.** Distribution of the Missing Rates for Measures of Health Status and Health Care Access and Affordability Between 1999 and 2018

**eTable 3.** Adjusted Annual Prevalence of Poor/Fair Health Status by Race and Ethnicity, 1999-2018

**eTable 4.** Comparison of our Age-Adjusted Trends in Poor/Fair Health Status, Estimated Using Direct Standardization, with Estimates from the National Center for Health Statistics Report

**eTable 5.** Adjusted Annual Prevalence of Functional Limitation by Race and Ethnicity, 1999-2018

**eTable 6.** Adjusted Annual Prevalence of Severe Psychological Distress by Race and Ethnicity, 1999-2018

**eTable 7.** Adjusted Trends in Poor/Fair Health Status, Functional Limitation, and Severe Psychological Distress, by Race and Ethnicity, Using Autoregressive Model, 1999–2018

**eTable 8.** Adjusted Annual Prevalence of Lack of Health Insurance by Race and Ethnicity, 1999-2018

**eTable 9.** Adjusted Annualized Rate of Change in the Prevalence of Measures of Health Status and Health Care Access, Utilization, and Affordability by Race, Ethnicity, and Income

**eTable 10.** Adjusted Annual Prevalence of Lack of a Usual Source of Care by Race and Ethnicity, 1999-2018

**eTable 11.** Adjusted Annual Prevalence of No Health Care Utilization in the Past Year by Race and Ethnicity, 1999-2018

**eTable 12.** Adjusted Annual Prevalence of Foregone or Delayed Medical Care Due to Cost by Race and Ethnicity, 1999-2018

**eTable 13.** Adjusted Trends in the Prevalence and Racial/Ethnic Differences of Health Care Access, Utilization, and Affordability Measures by Race and Ethnicity, Using Autoregressive Model, 1999–2018

**eReferences**

This supplemental material has been provided by the authors to give readers additional information about their work.

## eMethods 1. National Health Interview Survey Response Rates, 1999 to 2018.

The National Health Interview Survey (NHIS) assesses response rates at several different levels.<sup>1</sup> First, response rate is calculated at the household level – that is, by dividing the number of interviewed households by the sum of the number of interviewed households and the number of Type A nonresponse households. Type A nonresponse households include those that were sampled but were not interviewed for a range of reasons (e.g., language, absence, refusal). NHIS includes all Type A nonresponse households in the Household Response Rate calculations.

Next, NHIS reports two different sets of response rates, “Conditional” and “Final”, each reported at the level of “family” and “adult”. The difference between Conditional and Final rates is whether the household nonresponse is taken into account (“Final”) or not (“Conditional”).

For example:

- 1) The Conditional Sample Adult Response Rate for 2018 is 83.9% and *does not* take into account the household nonresponse. It is calculated by dividing the number of interviewed sample adults by the number of eligible sample adults from interviewed families.
- 2) The Sample Adult Final Response Rate for 2018 is 53.1% and *does* take into account the household and family nonresponse. It is calculated by dividing the number of interviewed sample adults by the number of eligible sample adults from interviewed families, and then multiplying this quotient by the Final Family Response Rate (which itself is derived from dividing interviewed families by families eligible for survey and multiplying by quotient of household response rate).

The Family rates are defined analogously, but at the level of families within households.

The following are the response rates (both yearly, and the pooled average) for NHIS from 1999-2018:

| Survey Year | Household Response Rate | Conditional Family Response Rate | Final Family Response Rate | Conditional Sample Adult Response Rate | Final Sample Adult Response Rate |
|-------------|-------------------------|----------------------------------|----------------------------|----------------------------------------|----------------------------------|
| 1999        | 87.6                    | 98.3                             | 86.1                       | 80.8                                   | 69.6                             |
| 2000        | 88.9                    | 98.2                             | 87.3                       | 82.6                                   | 72.1                             |
| 2001        | 88.9                    | 98.5                             | 87.6                       | 84.2                                   | 73.8                             |
| 2002        | 89.6                    | 98.3                             | 88.1                       | 84.4                                   | 74.3                             |
| 2003        | 89.2                    | 98.5                             | 87.9                       | 84.5                                   | 74.2                             |
| 2004        | 86.9                    | 99.6                             | 86.5                       | 83.8                                   | 72.5                             |
| 2005        | 86.5                    | 99.5                             | 86.1                       | 80.1                                   | 69.0                             |
| 2006        | 87.3                    | 99.6                             | 87.0                       | 81.4                                   | 70.8                             |
| 2007        | 87.1                    | 99.4                             | 86.6                       | 78.3                                   | 67.8                             |
| 2008        | 84.9                    | 99.5                             | 84.5                       | 74.2                                   | 62.6                             |
| 2009        | 82.2                    | 99.3                             | 81.6                       | 80.1                                   | 65.4                             |
| 2010        | 79.5                    | 99.1                             | 78.7                       | 77.3                                   | 60.8                             |
| 2011        | 82.0                    | 99.2                             | 81.3                       | 81.6                                   | 66.3                             |
| 2012        | 77.6                    | 99.0                             | 76.8                       | 79.7                                   | 61.2                             |
| 2013        | 75.7                    | 99.0                             | 74.9                       | 81.7                                   | 61.2                             |
| 2014        | 73.8                    | 99.0                             | 73.1                       | 80.5                                   | 58.9                             |
| 2015        | 70.1                    | 98.9                             | 69.3                       | 79.7                                   | 55.2                             |
| 2016        | 67.9                    | 98.9                             | 67.1                       | 80.9                                   | 54.3                             |
| 2017        | 66.5                    | 98.9                             | 65.7                       | 80.7                                   | 53.0                             |
| 2018        | 64.2                    | 98.7                             | 63.4                       | 83.9                                   | 53.1                             |
| Pooled Mean | 80.8                    | 99.0                             | 80.0                       | 81.0                                   | 64.8                             |

As such, the Conditional Response Rate for Sample Adults in our study period (1999-2018) is 81%, while the Final Response Rate for Sample Adults is 64.8%.

## eMethods 2. Details of Assessment of Study Outcomes.

We assessed trends in prevalence and racial/ethnic differences in health status and health care access, utilization, and affordability in this study.

### A. Health status

Physical and mental health status were evaluated by assessing the self-reported health status, psychological distress, and functioning in routine activities.

1. **Self-rated health status:** Health status was assessed using the question: “Would you say your health in general is excellent, very good, good, fair, or poor?” Responses were rated on a 5-point Likert scale, ranging from "excellent" to "poor".<sup>2</sup> We dichotomized the responses into a binary variable – poor/fair health status (yes vs no).
2. **Psychological distress:** Severe psychological distress was assessed using the Kessler-6 Scale (K6), which asks about 6 manifestations of nonspecific psychological distress over a 30-day recall period. The K6 asks how often, during the past 30 days, the respondent felt: 1) so sad that nothing could cheer him/her up, 2) nervous, 3) restless or fidgety, 4) hopeless, 5) that everything was an effort, and 6) worthless. Responses were rated on a 5-point scale based on the reported frequency of the feelings and were each assigned 0 to 4 points (i.e., 0 for "none of the time"; 1 for "a little of the time"; 2 for "some of the time"; 3 for "most of the time"; and 4 for "all of the time"). The summed responses ranged from 0 to 24 and persons with a score of  $\geq 13$  were identified as having severe psychological distress, per Kessler’s scoring.<sup>3</sup>

Note: the 6 survey questions related to non-specific psychological distress were included in the Adult Selected Items section since 2013 when this section was first introduced as part of the Sample Adult component. Prior to 2013, these questions were included in the Adult Conditions section of the Sample Adult component. However, the language of the questions used to assess this was not changed and the questions remained the same between 1999 and 2018. As such, moving the K6 questions to a different subsection within the Sample Adult component in 2013 would have had a minimal impact on how respondents answered the questions prior to 2013 and the estimates for severe psychological distress are comparable over time. Moreover, the positioning was the same by race/ethnicity and even if it had a minimal impact on the overall trends, it should not have affected the gap between the racial and ethnic groups.

3. **Functional limitation:** Functional limitation was assessed by asking respondents about their ability to perform 9 routine physical activities (derived from the work of Nagi<sup>4-6</sup>) and 3 routine social/leisure activities without special equipment. These questions or the composite score have been used in many studies using the NHIS data,<sup>7-10</sup> as well as from the American Community Survey,<sup>11</sup> the Medicare Current Beneficiary Survey,<sup>12</sup> the Health and Retirement Study,<sup>13</sup> and the Framingham Disability Study,<sup>14,15</sup> among others.<sup>16,17</sup> Although it’s usual to find studies focusing on the Nagi items alone (first 9 questions), we opted to include all 12 questions to have the most comprehensive understanding on the interference of health problems with an individual’s life in the US (including leisure/social activities).

Respondents were asked how difficult it was for them, by themselves and without using any special equipment, to: 1) walk a quarter of a mile (about 3 city blocks), 2) climb 10 steps without resting, 3) stand on their feet for about 2 hours, 4) sit for about 2 hours, 5) stoop, bend, or kneel, 6) reach up over their head, 7) use their fingers to grasp small objects, 8) lift or carry something as heavy as 10 pounds (e.g., a bag of groceries), 9) push or pull large objects like a chair, 10) go out to things like shopping, movies, or sporting events, 11) participate in social activities (e.g., visiting friends, attending clubs and meetings, going to parties), and 12) do things to relax at home or for leisure (e.g., reading, watching tv, sewing). Responses for each of these 12 questions were rated on a 5-point scale (ranging from 0 to 4 points): 0 “not at all difficult”, 1 “only a little difficult”, 2 “somewhat difficult”, 3 “very difficult”, and 4 “can’t do at all”. We dichotomized these responses to “not difficult at all” (scored as 0) and “any limitation” (scored as 1) and assessed the proportion of adults who were "limited in any way" by identifying participants who reported any degree of difficulty in any one or more of the functional activities.

## **B. Health care access, utilization, and affordability**

Health care access was evaluated by assessing by health insurance coverage and usual source of care. These are 2 key indicators of access to care because insurance coverage eases entry into the health care system and having a usual source of care facilitates the usage of preventive and screening services. Health care utilization was evaluated by assessing if the respondent had contact with a health professional in the past year. Affordability was evaluated by assessing if respondents had forgone or delayed medical care due to concerns about cost in the past 12 months. In this context, affordability may also be an indicator of access to care because it compromises the timeliness of care after it was deemed necessary. Detailed definitions are found below:

1. **Health insurance:** Individuals were classified as “uninsured” if at the time of interview, they reported not having any private health insurance, Medicare, Medicaid, military plan, government- or state-sponsored health plan, or if they had only Indian Health Service coverage.<sup>18</sup>
2. **Usual source of care:** Not having a usual source of care was defined as answering “No” to the question “Is there a place that you usually go to when you are sick or need advice about your health?”. If the individual answered “Yes” or “There is more than one place”, they were asked “What kind of place [is it/do you go to most often]—a clinic, doctor’s office, emergency room, or some other place?”. If the individual reported that the emergency room was their usual place for care, they were also considered not to have a usual source of care.<sup>19,20</sup>
3. **Health care utilization:** As a general indicator of health care utilization, we determined if individuals had not seen or talked to a health professional in the past 12 months based on combined responses of “More than 1 year, but not more than 2 years ago”, “More than 2 years, but not more than 5 years ago”, “More than 5 years ago”, and “Never” to the survey question, “About how long has it been since you last saw or talked to a doctor or other health care professional about your own health? Include doctors seen while a patient in a hospital.”<sup>21,22</sup>
4. **Foregone or delayed medical care due to cost:** Similar to other assessments of unmet medical needs due to cost using NHIS,<sup>20,23</sup> foregone or delayed medical care was defined as answering “Yes” to any of the following 3 questions: (during the past 12 months) “Has medical care been delayed for you because of worry about the cost?”; “Was there any time when you needed medical care, but did not get it because you couldn't afford it?”; or “Was there any time when you needed prescription medicines but didn't get it because you couldn't afford it?”.

### eMethods 3. Details Describing How This Study Meets the Standards for Publishing on Racial Health Inequities.

| No.                                                                                                                                                                                                                                                                                                                                 | Recommendation for researchers*                                                                                                                                                                                                                                                                                                                                                                                                                                                                                                                                                                              | What have we done in this study?                                                                                                                                                                                                                                                                                                                                                                                                                                                                                                                                                                                                              |
|-------------------------------------------------------------------------------------------------------------------------------------------------------------------------------------------------------------------------------------------------------------------------------------------------------------------------------------|--------------------------------------------------------------------------------------------------------------------------------------------------------------------------------------------------------------------------------------------------------------------------------------------------------------------------------------------------------------------------------------------------------------------------------------------------------------------------------------------------------------------------------------------------------------------------------------------------------------|-----------------------------------------------------------------------------------------------------------------------------------------------------------------------------------------------------------------------------------------------------------------------------------------------------------------------------------------------------------------------------------------------------------------------------------------------------------------------------------------------------------------------------------------------------------------------------------------------------------------------------------------------|
| 1.                                                                                                                                                                                                                                                                                                                                  | Define race during the experimental design and specify the reason for its use in the study. Such definitions should be couched within a sociopolitical framework, not a biological one, that explicitly reviews all relevant social, environmental, and structural factors for which race may serve as a proxy measure. For the reader, these additional details enable careful interpretation of study results and implications. But for authors, it engenders critical thinking about racial constructs that prevent the reification of race as a biological entity.                                       | We define race and ethnicity in the Methods and explain how it was ascertained (i.e., based on the response of study participants to specific questions about race and ethnicity).                                                                                                                                                                                                                                                                                                                                                                                                                                                            |
| 2.                                                                                                                                                                                                                                                                                                                                  | Name racism, identify the form (interpersonal, institutional, or internalized), the mechanism by which it may be operating, and other intersecting forms of oppression (such as based on sex, sexual orientation, age, regionality, nationality, religion, or income) that may compound its effects. A critical race theory framework lends authors a vocabulary for discussing racism and its potential relationship to the study's findings. And naming racism explicitly helps authors avoid incorrectly assigning race as a risk factor, when racism is the risk factor for racially disparate outcomes. | We name racism explicitly in the Discussion section as shown below (in bold):<br><i>“These findings may have important implications. Despite a wide variety of health care and social policies and markedly increased health care spending, health inequities persisted with modest evidence of progress. <b>Structural factors in the US society, including systemic racism and barriers associated with citizenship status, can contribute to such inequities.</b>”</i>                                                                                                                                                                     |
| 3.                                                                                                                                                                                                                                                                                                                                  | Never offer genetic interpretations of race because such suppositions are not grounded in science. If race and genetics are being expressed jointly, painstakingly delineate the intended implication.                                                                                                                                                                                                                                                                                                                                                                                                       | We do not provide any genetic interpretations of race.                                                                                                                                                                                                                                                                                                                                                                                                                                                                                                                                                                                        |
| 4.                                                                                                                                                                                                                                                                                                                                  | Solicit patient input. Use community review boards or form patient panels to ensure the outcomes of research reflect the priorities of the populations studied.                                                                                                                                                                                                                                                                                                                                                                                                                                              | All data are self-reported and reflect the experience of the US population.                                                                                                                                                                                                                                                                                                                                                                                                                                                                                                                                                                   |
| 5.                                                                                                                                                                                                                                                                                                                                  | Identify the stakes. “All policy is health policy,” and all research on racial health inequities has implications for broader public policy and clinical practice. Inform readers of these potential applications.                                                                                                                                                                                                                                                                                                                                                                                           | We provide the implications of our findings in the Discussion section.                                                                                                                                                                                                                                                                                                                                                                                                                                                                                                                                                                        |
| 6.                                                                                                                                                                                                                                                                                                                                  | Cite the experts, particularly scholars of color whose work forms the basis of the field's knowledge on racism and its effects.                                                                                                                                                                                                                                                                                                                                                                                                                                                                              | We have added the following references describing the effects of racism and social factors on health: <ul style="list-style-type: none"> <li>• Cogburn CD. Culture, race, and health: implications for racial inequities and population health. <i>The Milbank Quarterly</i>. 2019;97(3):736-761.</li> <li>• Macintosh T, Desai MM, Lewis TT, Jones BA, Nunez-Smith M. Socially-assigned race, healthcare discrimination and preventive healthcare services. <i>PLoS One</i>. 2013;8(5):e64522</li> <li>• Phelan JC, Link BG. Is racism a fundamental cause of inequalities in health? <i>Annu Rev Sociol</i>. 2015;41(1):311-330.</li> </ul> |
| <small>*Source: Boyd RW, Lindo EG, Weeks LD, McLemore MR. On racism: a new standard for publishing on racial health inequities. Health Affairs Blog, July 2, 2020. <a href="https://www.healthaffairs.org/doi/10.1377/hblog20200630.939347/full/">https://www.healthaffairs.org/doi/10.1377/hblog20200630.939347/full/</a>.</small> |                                                                                                                                                                                                                                                                                                                                                                                                                                                                                                                                                                                                              |                                                                                                                                                                                                                                                                                                                                                                                                                                                                                                                                                                                                                                               |

**eFigure 1. Race and Ethnicity Distribution Among Adults in the US, National Health Interview Survey 1999-2018.**

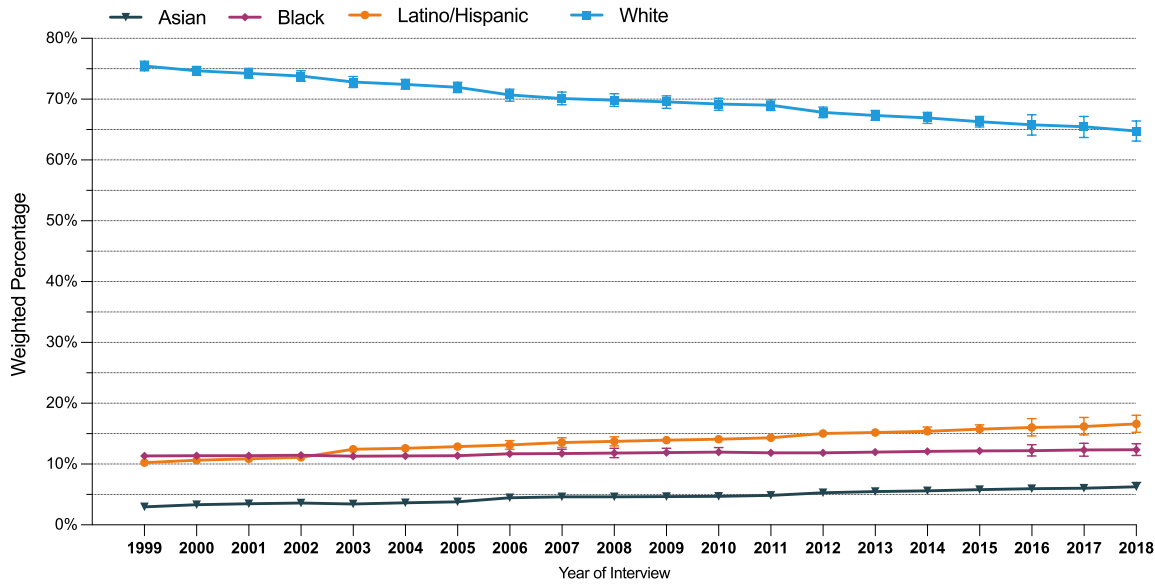

| Race/ethnicity  | Study sample size (number of adults) |               |               |               |               |               |               |               |               |               |               |               |               |               |               |               |               |               | Total         |               |                |
|-----------------|--------------------------------------|---------------|---------------|---------------|---------------|---------------|---------------|---------------|---------------|---------------|---------------|---------------|---------------|---------------|---------------|---------------|---------------|---------------|---------------|---------------|----------------|
|                 | 1999                                 | 2000          | 2001          | 2002          | 2003          | 2004          | 2005          | 2006          | 2007          | 2008          | 2009          | 2010          | 2011          | 2012          | 2013          | 2014          | 2015          | 2016          |               | 2017          | 2018           |
| Asian           | 736                                  | 861           | 913           | 902           | 878           | 908           | 957           | 1,292         | 1,220         | 1,238         | 1,590         | 1,709         | 2,059         | 2,142         | 2,093         | 2,055         | 1,920         | 1,645         | 1,331         | 1,309         | 27,758         |
| Black           | 4,212                                | 4,546         | 4,603         | 4,170         | 4,150         | 4,352         | 4,358         | 4,004         | 3,681         | 3,365         | 4,441         | 4,483         | 4,974         | 5,234         | 5,280         | 5,025         | 4,574         | 3,626         | 2,936         | 2,948         | 84,962         |
| Latino/Hispanic | 4,928                                | 5,377         | 5,615         | 5,273         | 5,416         | 5,579         | 5,506         | 4,227         | 4,196         | 3,673         | 5,165         | 5,158         | 5,867         | 5,859         | 5,943         | 6,053         | 5,591         | 3,806         | 3,244         | 3,179         | 99,655         |
| White           | 20,564                               | 21,318        | 21,884        | 20,442        | 20,169        | 20,212        | 20,368        | 14,548        | 14,052        | 13,289        | 16,268        | 15,570        | 19,733        | 20,842        | 20,799        | 23,058        | 21,080        | 23,374        | 18,841        | 17,569        | 383,980        |
| <b>Total</b>    | <b>30,440</b>                        | <b>32,102</b> | <b>33,015</b> | <b>30,787</b> | <b>30,613</b> | <b>31,051</b> | <b>31,189</b> | <b>24,071</b> | <b>23,149</b> | <b>21,565</b> | <b>27,464</b> | <b>26,920</b> | <b>32,633</b> | <b>34,077</b> | <b>34,115</b> | <b>36,191</b> | <b>33,165</b> | <b>32,451</b> | <b>26,352</b> | <b>25,005</b> | <b>596,355</b> |

**eFigure 2. Trends in the Estimated Proportion of Individuals with Low Income Between 1999 and 2018, by Race and Ethnicity.**

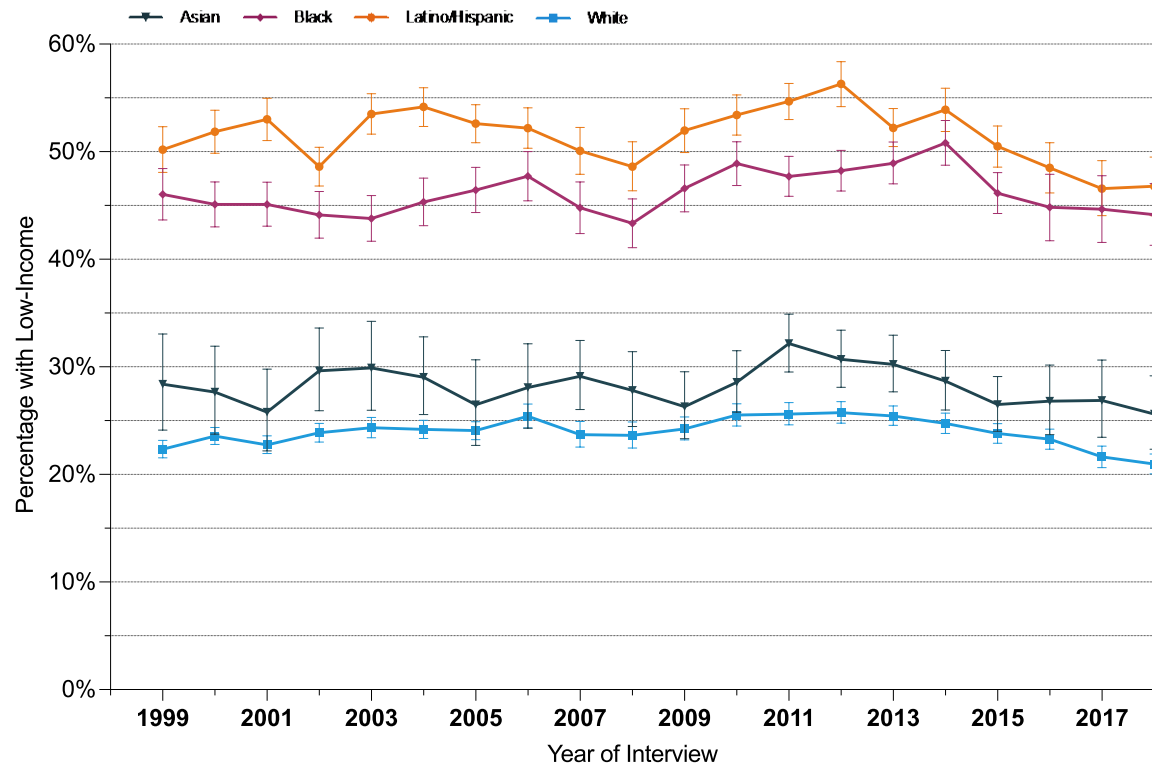

Legend: Annual prevalence of low income by race/ethnicity was obtained by analyzing the multiply imputed income variables in the publicly available NHIS dataset. From 1999 to 2018, the estimated prevalence of people with low income changed by -2.79 points (95% CI: -8.61, 3.03; P=0.35) among Asian individuals, by -1.88 points (95% CI: -5.69, 1.93; P=0.33) among Black individuals, by -3.40 points (95% CI: -6.96, 0.15; P=0.06) among Latino/Hispanic individuals, and by -1.37 points (95% CI: -2.64, -0.11; P=0.03) among White individuals. In the same period, the gap between White and Asian individuals changed by -1.42 points (95% CI: -7.37, 4.54; P=0.64), between White and Black individuals by -0.51 points (95% CI: -4.52, 3.51; P=0.80), and between White and Latino/Hispanic individuals by -2.03 points (95% CI: -5.80, 1.74; P=0.29).

**eFigure 3. Adjusted Overall Trends in Self-Reported Health Status, Functional Limitation, and Severe Psychological Distress (A), and in Health Care Access, Utilization, and Affordability Measures (B), 1999–2018.**

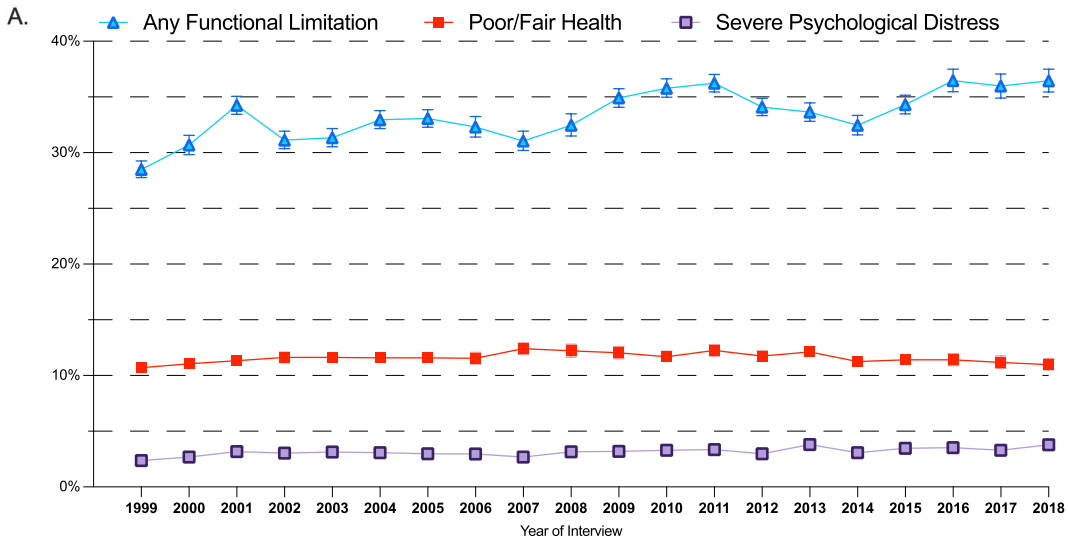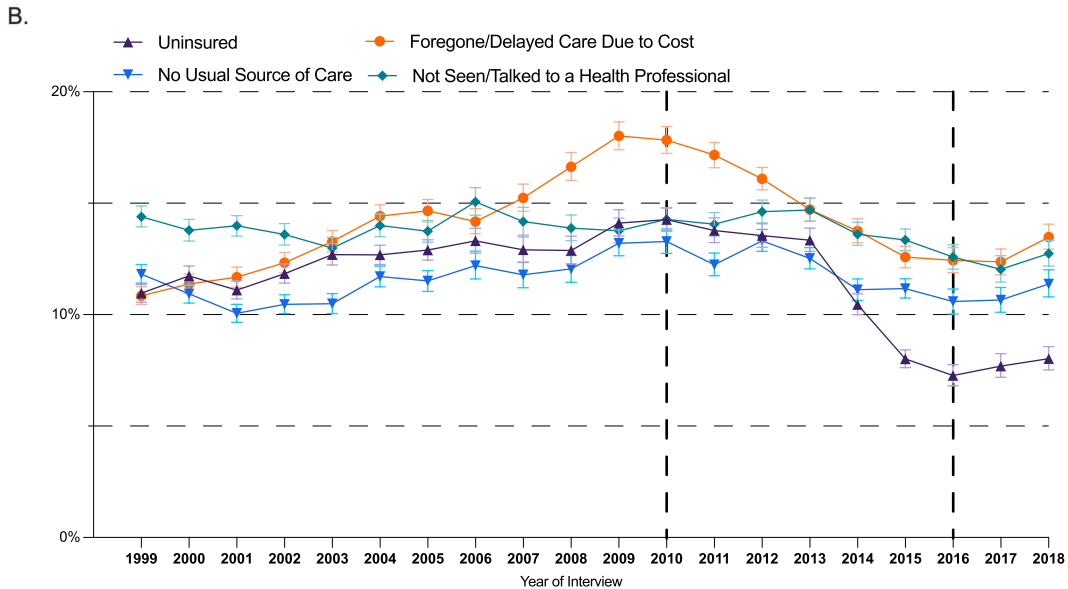

Legend: For the access to care indicators, rather than assuming a monotonic relationship between time and outcome rates, time was modelled as a linear spline with knots at 2010 and 2016 (dotted vertical lines) to reflect the observed inflection points of unmet medical needs due to cost and health insurance coverage. Of note, the Affordable Care Act was enacted in March 2010. Rates of each measure were adjusted for age, sex, and US region.



**eFigure 4. Adjusted Trends of Self-Reported Poor/Fair Health Status, Functional Limitation, and Severe Psychological Distress by Race, Ethnicity, and Income, 1999–2018.**

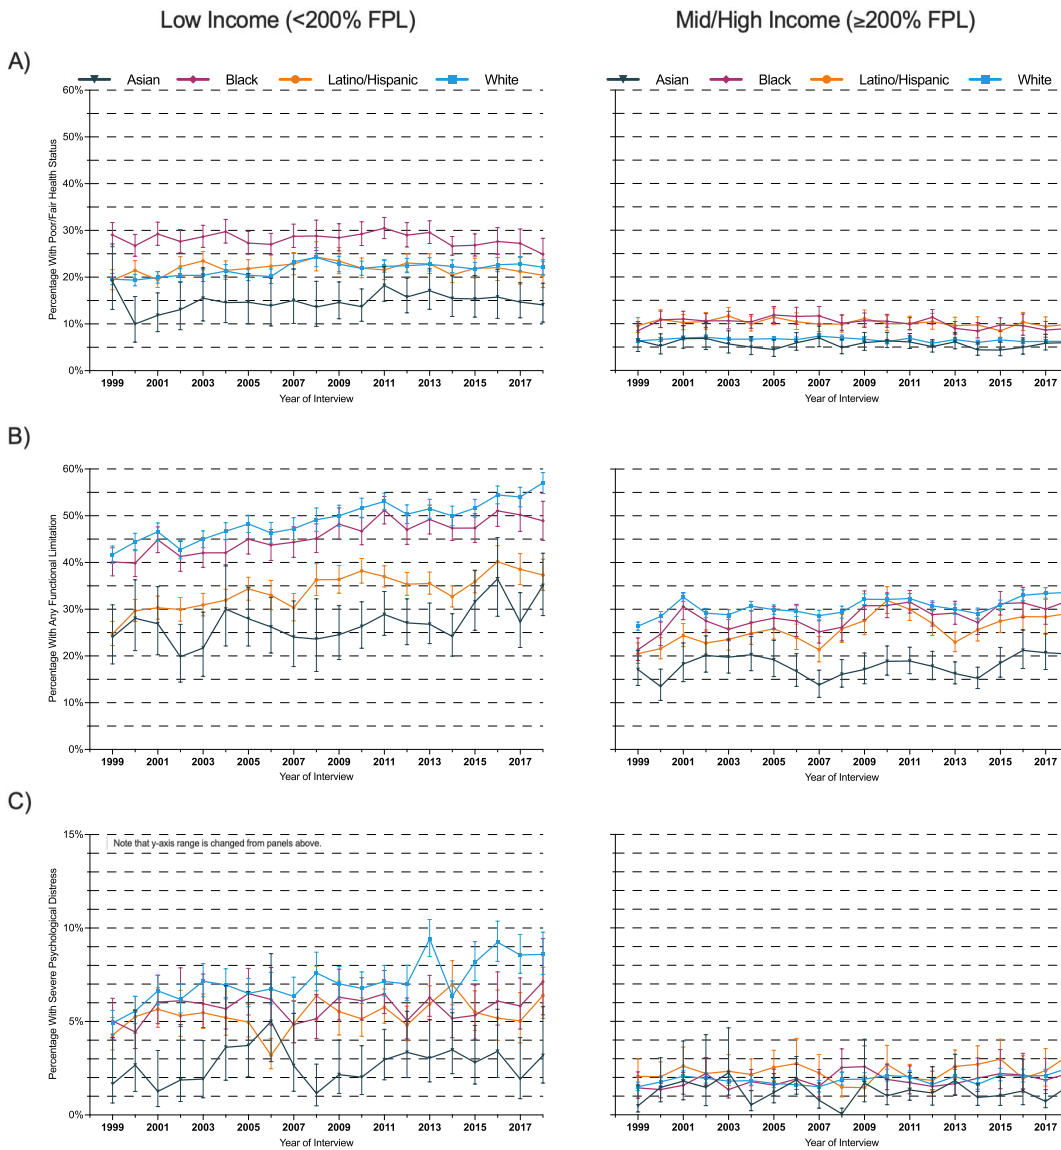

Abbreviations: FPL, Federal Poverty Limit.

Legend: Data source is the National Health Interview Survey from years 1999 to 2018. Rates are adjusted for age, sex, and US region using logistic regression, with 95% confidence intervals shown in brackets.

**eFigure 5. Adjusted Trends of Limitations in Physical Tasks (A) and Social/Leisure Activities (B) by Race and Ethnicity, 1999–2018.**

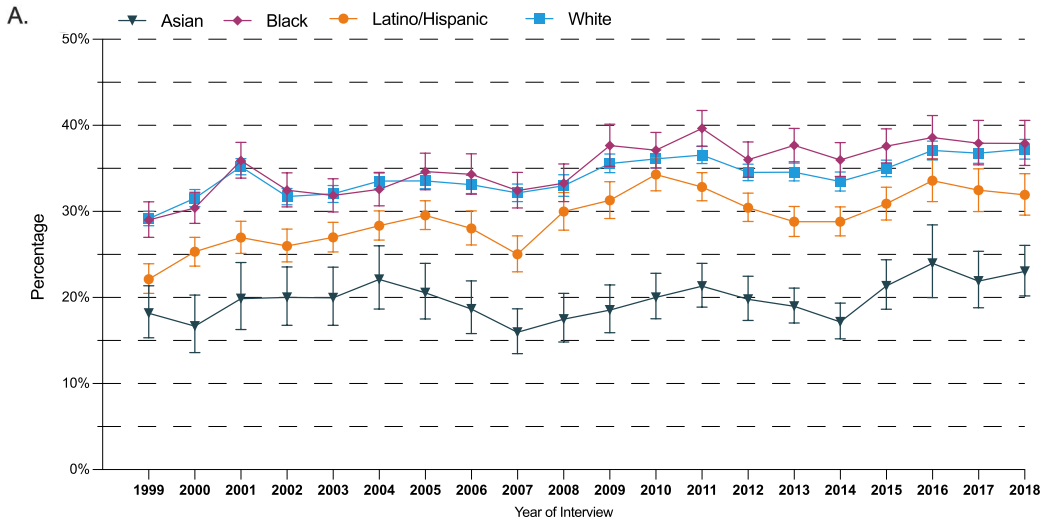

Participants were classified as having a limitation in physical tasks if they reported any limitation—by themselves and without using any special equipment— to: 1) walk a quarter of a mile (about 3 city blocks); 2) climb 10 steps without resting; 3) stand on their feet for about 2 hours; 4) sit for about 2 hours; 5) stoop, bend, or kneel; 6) reach up over their head; 7) use their fingers to grasp small objects; 8) lift or carry something as heavy as 10 pounds (e.g., a bag of groceries); or 9) push or pull large objects like a chair.

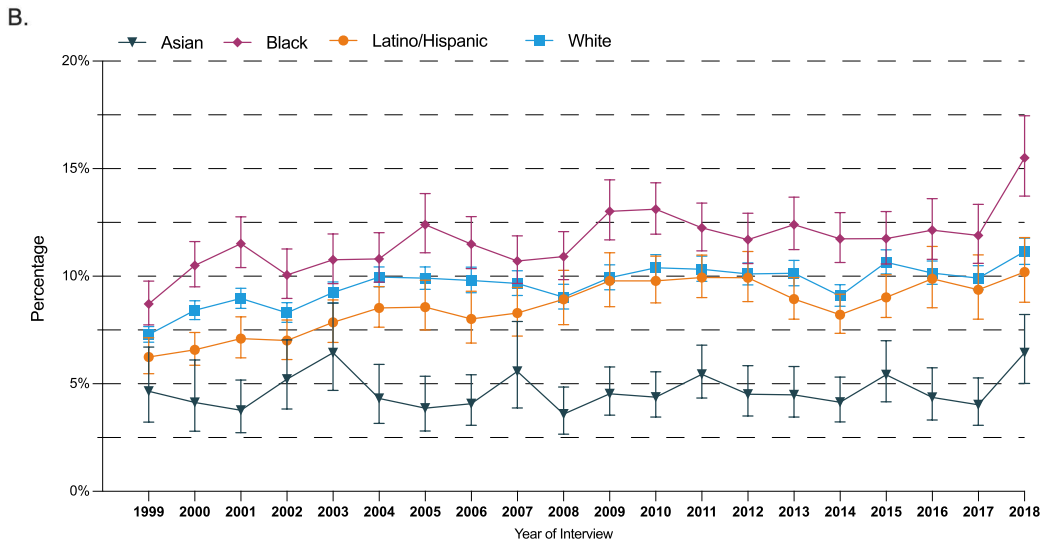

Participants were classified as having a limitation in social/leisure activities if they reported any limitation—by themselves and without using any special equipment— to: 1) go out to things like shopping, movies, or sporting events; 2) participate in social activities (e.g., visiting friends, attending clubs and meetings, going to parties); or 3) do things to relax at home or for leisure (e.g., reading, watching tv, sewing).

# eFigure 6. Adjusted Trends of Self-Reported Health Care Access, Utilization, and Affordability Measures by Race, Ethnicity, and Income, 1999–2018.

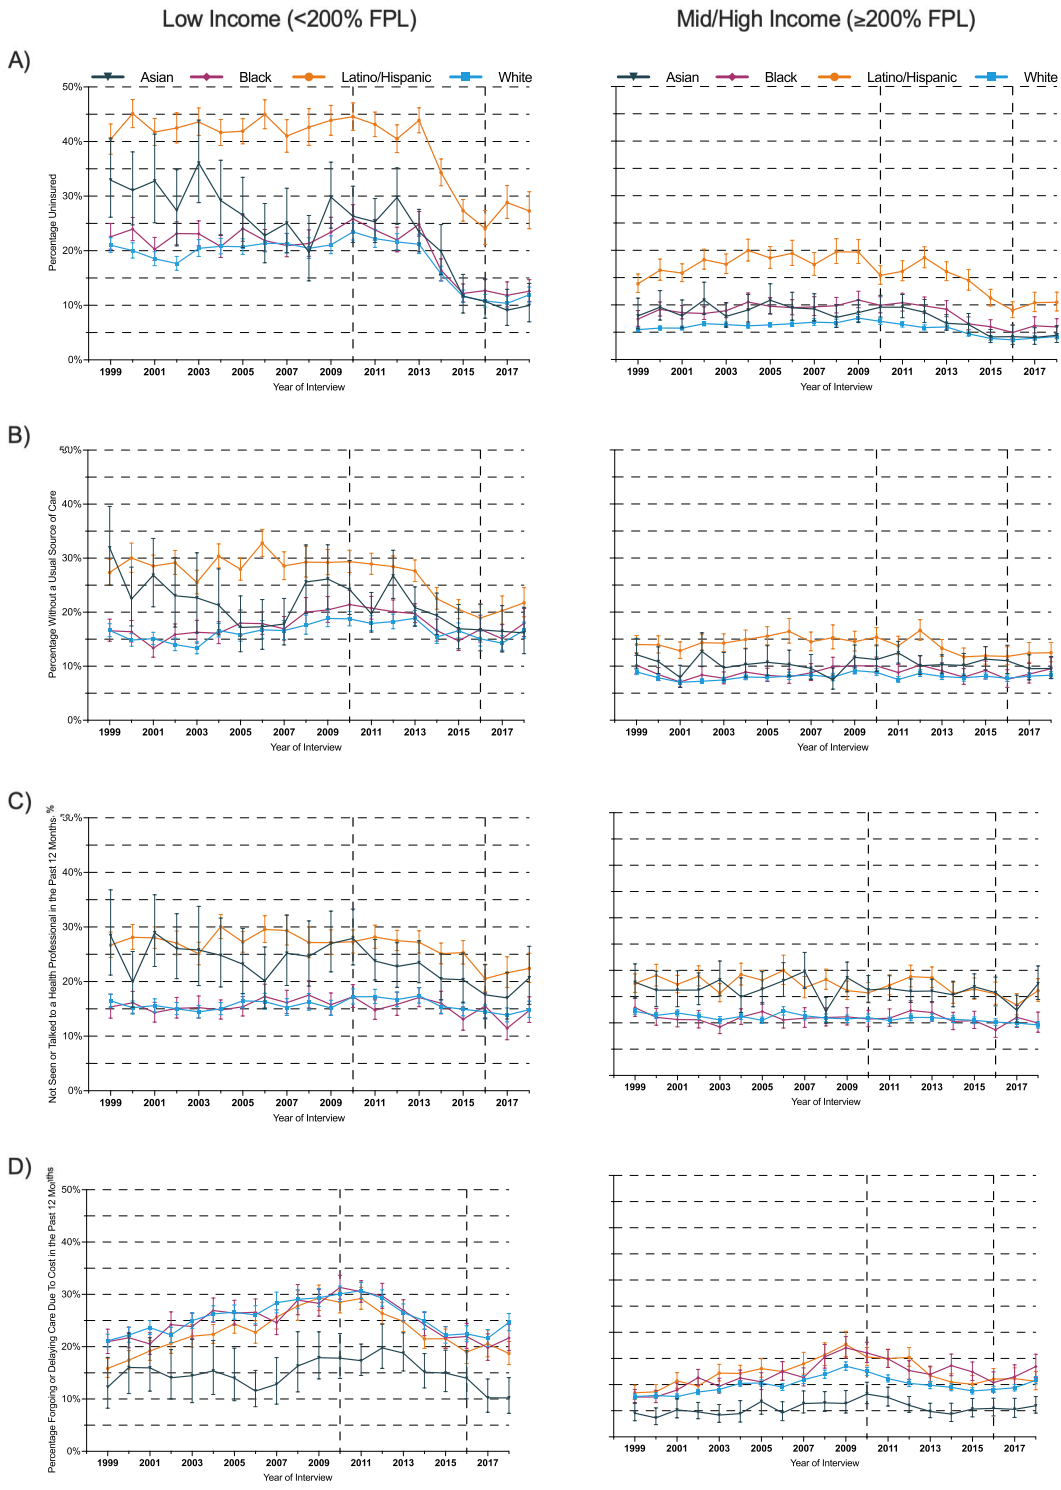

Abbreviations: FPL, Federal Poverty Limit.

Legend: Data source is the National Health Interview Survey from years 1999 to 2018. Rates are adjusted for age, sex, and US region using logistic regression, with 95% confidence intervals shown in brackets. For these measures, rather than assuming a monotonic relationship between time and outcome rates, time was modelled as a linear spline with knots at 2010 and 2016 (dotted vertical lines) to reflect the observed inflection points of foregone or delayed medical care due to cost and health insurance coverage. Of note, the Affordable Care Act was enacted in March 2010.

**eTable 1. General Characteristics of the Study Population by Race and Ethnicity in 1999–2000, 2008–2009, and 2017–2018.**

|                                         | Asian             |                   |                   | Black             |                   |                   | Latino/Hispanic        |                   |                   | White             |                   |                   |
|-----------------------------------------|-------------------|-------------------|-------------------|-------------------|-------------------|-------------------|------------------------|-------------------|-------------------|-------------------|-------------------|-------------------|
|                                         | 1999–2000         | 2008–2009         | 2017–2018         | 1999–2000         | 2008–2009         | 2017–2018         | 1999–2000              | 2008–2009         | 2017–2018         | 1999–2000         | 2008–2009         | 2017–2018         |
| Sample size, n [total=596,355]          | n=1597            | n=2828            | n=2640            | n=8758            | n=7806            | n=5884            | n=10,305               | n=8838            | n=6423            | n=41,882          | n=29,557          | n=36,410          |
| Age in years, median (IQR)              | 39 (28–55)        | 41 (30–55)        | 43 (32–57)        | 40 (29–52)        | 42 (29–55)        | 43 (30–58)        | 37 (27–49)             | 37 (28–50)        | 39 (28–53)        | 44 (33–59)        | 47 (33–61)        | 50 (34–64)        |
| Age category, % (95% CI)                |                   |                   |                   |                   |                   |                   |                        |                   |                   |                   |                   |                   |
| 18–39 years                             | 52.4 (49.2, 55.6) | 45.9 (43.4, 48.5) | 41.9 (39.3, 44.6) | 49.8 (48.3, 51.3) | 45.1 (43.4, 46.8) | 43.7 (41.8, 45.6) | 56.9 (55.4, 58.3)      | 54.6 (53.0, 56.1) | 50.1 (48.4, 51.9) | 39.5 (38.9, 40.2) | 34.9 (34.0, 35.8) | 33.3 (32.6, 34.1) |
| 40–64 years                             | 38.2 (35.1, 41.4) | 40.8 (38.2, 43.5) | 42.5 (40.2, 44.9) | 38.5 (37.1, 39.8) | 42.9 (41.4, 44.4) | 41.1 (39.3, 42.9) | 34.1 (33.0, 35.3)      | 37.1 (35.7, 38.5) | 39.1 (37.6, 40.6) | 42.2 (41.5, 42.8) | 45.8 (45.0, 46.5) | 42.3 (41.6, 43.0) |
| ≥65 years                               | 9.4 (7.8, 11.4)   | 13.3 (11.8, 14.9) | 15.5 (13.9, 17.4) | 11.8 (11.0, 12.6) | 12.0 (11.2, 12.9) | 15.3 (14.2, 16.3) | 9.0 (8.1, 10.0)        | 8.4 (7.7, 9.1)    | 10.8 (9.9, 11.8)  | 18.3 (17.8, 18.8) | 19.3 (18.7, 20.0) | 24.4 (23.7, 25.1) |
| Sex, % (95% CI)                         |                   |                   |                   |                   |                   |                   |                        |                   |                   |                   |                   |                   |
| Men                                     | 48.7 (45.4, 51.9) | 47.4 (45.1, 49.7) | 46.7 (44.4, 49.0) | 44.4 (43.0, 45.9) | 44.6 (43.1, 46.1) | 45.5 (43.7, 47.2) | 49.4 (48.2, 50.6)      | 51.4 (50.0, 52.8) | 49.7 (48.1, 51.4) | 48.1 (47.6, 48.7) | 48.4 (47.7, 49.1) | 48.6 (48.0, 49.3) |
| Women                                   | 51.4 (48.1, 54.6) | 52.6 (50.3, 54.9) | 53.3 (51.1, 55.6) | 55.6 (54.1, 57.0) | 55.4 (53.9, 56.9) | 54.5 (52.8, 56.3) | 50.6 (49.4, 51.8)      | 48.6 (47.2, 50.0) | 50.3 (48.7, 51.9) | 51.9 (51.3, 52.4) | 51.6 (51.0, 52.3) | 51.4 (50.7, 52.0) |
| US citizenship, % (95% CI) [n=594,976]  | 57.9 (54.3, 61.4) | 69.6 (66.8, 72.2) | 70.5 (67.9, 73.1) | 95.4 (94.7, 96.0) | 95.0 (94.2, 95.6) | 94.9 (93.8, 95.9) | 62.6 (60.5, 64.7)      | 62.2 (60.2, 64.1) | 72.3 (70.6, 74.0) | 98.4 (98.2, 98.5) | 98.5 (98.3, 98.7) | 98.5 (98.3, 98.7) |
| Education level, % (95% CI) [n=591,769] |                   |                   |                   |                   |                   |                   |                        |                   |                   |                   |                   |                   |
| Less than high school                   | 11.4 (9.4, 13.7)  | 9.2 (7.9, 10.7)   | 7.9 (6.6, 9.5)    | 24.4 (23.1, 25.8) | 17.7 (16.4, 19.1) | 14.2 (12.9, 15.7) | 44.7 (43.0, 46.3)      | 38.5 (37.0, 40.1) | 27.8 (26.0, 29.7) | 13.4 (12.9, 13.9) | 10.5 (10.0, 11.1) | 7.4 (6.9, 7.9)    |
|                                         | <b>Asian</b>      |                   |                   | <b>Black</b>      |                   |                   | <b>Latino/Hispanic</b> |                   |                   | <b>White</b>      |                   |                   |

|                                                             | 1999–<br>2000           | 2008–<br>2009           | 2017–<br>2018           |
|-------------------------------------------------------------|-------------------------|-------------------------|-------------------------|-------------------------|-------------------------|-------------------------|-------------------------|-------------------------|-------------------------|-------------------------|-------------------------|-------------------------|
| High school diploma /GED                                    | 18.1<br>(16.1,<br>20.2) | 16.3<br>(14.4,<br>18.3) | 15.3<br>(13.5,<br>17.4) | 31.5<br>(30.2,<br>32.8) | 30.6<br>(29.2,<br>32.1) | 28.9<br>(27.3,<br>30.5) | 24.3<br>(23.3,<br>25.4) | 26.6<br>(25.2,<br>28.0) | 26.7<br>(25.1,<br>28.3) | 31.7<br>(31.0,<br>32.4) | 28.2<br>(27.5,<br>28.9) | 23.6<br>(22.9,<br>24.4) |
| Some college                                                | 24.2<br>(21.7,<br>26.9) | 24.4<br>(22.2,<br>26.7) | 20.8<br>(18.8,<br>22.9) | 29.7<br>(28.3,<br>31.0) | 34.0<br>(32.5,<br>35.5) | 32.9<br>(31.2,<br>34.7) | 21.7<br>(20.5,<br>23.0) | 22.6<br>(21.4,<br>23.8) | 28.1<br>(26.5,<br>29.7) | 29.5<br>(29.0,<br>30.0) | 31.5<br>(30.9,<br>32.2) | 31.4<br>(30.6,<br>32.1) |
| ≥Bachelor's degree                                          | 46.4<br>(43.3,<br>49.5) | 50.1<br>(46.8,<br>53.5) | 56.0<br>(52.9,<br>59.0) | 14.5<br>(13.4,<br>15.7) | 17.7<br>(16.5,<br>18.9) | 24.1<br>(22.2,<br>26.0) | 9.4 (8.5,<br>10.3)      | 12.4<br>(11.4,<br>13.4) | 17.5<br>(16.0,<br>19.0) | 25.4<br>(24.7,<br>26.1) | 29.8<br>(28.9,<br>30.7) | 37.6<br>(36.5,<br>38.7) |
|                                                             |                         |                         |                         |                         |                         |                         |                         |                         |                         |                         |                         |                         |
| Income <200% Federal Poverty Limit, <sup>a</sup> % (95% CI) | 28.0<br>(23.9,<br>32.5) | 27.1<br>(23.9,<br>30.5) | 26.2<br>(22.9,<br>29.9) | 45.6<br>(43.3,<br>47.8) | 45.0<br>(42.7,<br>47.2) | 44.4<br>(41.4,<br>47.4) | 51.0<br>(49.0,<br>53.1) | 50.3<br>(48.1,<br>52.5) | 46.7<br>(44.1,<br>49.3) | 23.0<br>(22.2,<br>23.8) | 23.9<br>(22.8,<br>25.1) | 21.3<br>(20.3,<br>22.3) |
| Uninsured at the time of interview, % (95% CI) [n=594,122]  | 17.4<br>(15.2,<br>19.8) | 13.9<br>(12.2,<br>15.8) | 6.3 (5.3,<br>7.6)       | 20.3<br>(19.2,<br>21.4) | 20.8<br>(19.6,<br>22.0) | 12.1<br>(10.8,<br>13.5) | 36.3<br>(34.5,<br>38.1) | 38.9<br>(37.0,<br>40.8) | 24.0<br>(22.2,<br>26.0) | 11.0<br>(10.6,<br>11.4) | 12.3<br>(11.8,<br>12.9) | 6.5 (6.2,<br>6.9)       |
| US region of residence, <sup>b</sup> % (95% CI)             |                         |                         |                         |                         |                         |                         |                         |                         |                         |                         |                         |                         |
| Northeast                                                   | 21.2<br>(18.7,<br>24.0) | 18.8<br>(16.4,<br>21.5) | 20.8<br>(16.9,<br>25.4) | 18.0<br>(16.7,<br>19.4) | 16.4<br>(14.8,<br>18.2) | 16.0<br>(13.5,<br>18.8) | 15.7<br>(14.5,<br>17.1) | 13.4<br>(11.7,<br>15.2) | 13.5<br>(11.2,<br>16.2) | 20.2<br>(19.5,<br>21.0) | 18.3<br>(17.3,<br>19.3) | 19.2<br>(17.5,<br>21.1) |
| Midwest                                                     | 14.7<br>(11.9,<br>18.0) | 15.0<br>(12.7,<br>17.7) | 11.8<br>(9.5,<br>14.6)  | 18.8<br>(17.2,<br>20.5) | 19.3<br>(17.3,<br>21.5) | 15.2<br>(13.0,<br>17.8) | 7.9 (6.9,<br>9.1)       | 9.5<br>(8.1,<br>11.2)   | 9.4<br>(7.6,<br>11.6)   | 29.4<br>(28.5,<br>30.3) | 28.6<br>(27.2,<br>30.0) | 27.4<br>(25.7,<br>29.3) |
| South                                                       | 18.9<br>(16.4,<br>21.8) | 19.3<br>(17.2,<br>21.7) | 25.5<br>(21.6,<br>30.0) | 55.7<br>(53.4,<br>57.9) | 56.1<br>(53.5,<br>58.7) | 60.5<br>(56.7,<br>64.3) | 35.4<br>(33.2,<br>37.8) | 35.4<br>(33.4,<br>37.4) | 37.1<br>(32.5,<br>42.0) | 33.9<br>(33.0,<br>34.8) | 33.8<br>(32.3,<br>35.4) | 33.0<br>(30.9,<br>35.2) |
| West                                                        | 45.2<br>(41.2,<br>49.2) | 46.8<br>(43.6,<br>50.1) | 41.8<br>(36.7,<br>47.1) | 7.6 (6.7,<br>8.5)       | 8.1 (7.3,<br>9.1)       | 8.3 (6.9,<br>9.9)       | 40.9<br>(38.6,<br>43.3) | 41.7<br>(39.4,<br>44.1) | 40.0<br>(35.3,<br>44.8) | 16.5<br>(15.8,<br>17.2) | 19.3<br>(18.3,<br>20.4) | 20.4<br>(18.3,<br>22.7) |
| Married or living with partner, % (95% CI) [n=593,917]      | 64.4<br>(61.3,<br>67.3) | 64.1<br>(61.2,<br>66.8) | 65.0<br>(62.5,<br>67.5) | 37.4<br>(35.9,<br>38.9) | 35.2<br>(33.6,<br>36.8) | 32.6<br>(31.0,<br>34.3) | 58.5<br>(57.4,<br>59.6) | 54.4<br>(52.8,<br>56.0) | 49.3<br>(47.6,<br>50.9) | 61.6<br>(60.8,<br>62.3) | 57.9<br>(56.9,<br>58.8) | 56.4<br>(55.6,<br>57.1) |
|                                                             | <b>Asian</b>            |                         |                         | <b>Black</b>            |                         |                         | <b>Latino/Hispanic</b>  |                         |                         | <b>White</b>            |                         |                         |

|                                                 | 1999–<br>2000           | 2008–<br>2009           | 2017–<br>2018           |
|-------------------------------------------------|-------------------------|-------------------------|-------------------------|-------------------------|-------------------------|-------------------------|-------------------------|-------------------------|-------------------------|-------------------------|-------------------------|-------------------------|
| Employment status,<br>% (95% CI)<br>[n=595,593] |                         |                         |                         |                         |                         |                         |                         |                         |                         |                         |                         |                         |
| With a<br>job/Working                           | 66.1<br>(63.4,<br>68.6) | 65.1<br>(62.6,<br>67.5) | 67.2<br>(64.9,<br>69.3) | 64.1<br>(62.6,<br>65.5) | 60.7<br>(59.2,<br>62.3) | 61.1<br>(59.0,<br>63.1) | 66.3<br>(65.0,<br>67.5) | 64.2<br>(62.9,<br>65.5) | 66.5<br>(64.7,<br>68.3) | 65.7<br>(65.0,<br>66.4) | 62.5<br>(61.6,<br>63.4) | 62.1<br>(61.3,<br>63.0) |
| Not in labor force                              | 31.8<br>(29.2,<br>34.5) | 30.4<br>(28.0,<br>32.8) | 30.0<br>(27.8,<br>32.3) | 32.0<br>(30.6,<br>33.5) | 31.3<br>(29.9,<br>32.8) | 32.4<br>(30.5,<br>34.4) | 31.2<br>(30.0,<br>32.4) | 28.9<br>(27.8,<br>30.1) | 29.9<br>(28.0,<br>31.8) | 32.9<br>(32.3,<br>33.6) | 33.4<br>(32.5,<br>34.3) | 35.4<br>(34.6,<br>36.2) |
| Unemployed                                      | 2.2 (1.5,<br>3.1)       | 4.6 (3.7,<br>5.6)       | 2.8 (2.1,<br>3.8)       | 3.9 (3.4,<br>4.6)       | 7.9 (7.2,<br>8.8)       | 6.5 (5.7,<br>7.4)       | 2.5 (2.2,<br>2.9)       | 6.9<br>(6.2,<br>7.7)    | 3.6<br>(3.0,<br>4.3)    | 1.4 (1.3,<br>1.5)       | 4.1 (3.8,<br>4.4)       | 2.5 (2.3,<br>2.7)       |
| Comorbidities, %<br>(95% CI)                    |                         |                         |                         |                         |                         |                         |                         |                         |                         |                         |                         |                         |
| Hypertension                                    | 14.9<br>(12.9,<br>17.2) | 22.3<br>(20.2,<br>24.6) | 24.2<br>(22.2,<br>26.3) | 28.8<br>(27.6,<br>30.1) | 35.4<br>(34.0,<br>36.9) | 37.6<br>(35.9,<br>39.3) | 15.3<br>(14.4,<br>16.2) | 20.0<br>(18.9,<br>21.1) | 22.3<br>(21.0,<br>23.8) | 23.0<br>(22.5,<br>23.4) | 30.4<br>(29.7,<br>31.1) | 32.7<br>(31.9,<br>33.4) |
| Diabetes                                        | 3.9 (3.0,<br>5.1)       | 7.4 (6.2,<br>8.8)       | 8.9 (7.7,<br>10.3)      | 8.2 (7.5,<br>8.9)       | 11.3<br>(10.4,<br>12.2) | 11.7<br>(10.8,<br>12.7) | 6.3 (5.8,<br>6.9)       | 8.7<br>(8.0,<br>9.6)    | 10.5<br>(9.6,<br>11.4)  | 5.2 (5.0,<br>5.4)       | 8.2 (7.9,<br>8.6)       | 9.1 (8.7,<br>9.4)       |
| Prior stroke/<br>myocardial<br>infarction       | 1.7 (1.2,<br>2.2)       | 2.3 (1.8,<br>2.9)       | 3.2 (2.5,<br>4.0)       | 4.5 (4.0,<br>5.1)       | 5.5 (4.9,<br>6.1)       | 6.0 (5.4,<br>6.7)       | 2.5 (2.2,<br>2.9)       | 3.2<br>(2.8,<br>3.7)    | 3.3<br>(2.8,<br>3.9)    | 5.1 (4.9,<br>5.3)       | 6.3 (6.0,<br>6.7)       | 6.4 (6.1,<br>6.8)       |
| Cancer                                          | 1.7 (1.1,<br>2.7)       | 3.0 (2.4,<br>3.7)       | 4.3 (3.4,<br>5.3)       | 2.9 (2.5,<br>3.4)       | 3.8 (3.4,<br>4.4)       | 4.8 (4.3,<br>5.4)       | 2.2 (1.9,<br>2.5)       | 2.7<br>(2.3,<br>3.2)    | 3.4<br>(2.9,<br>3.8)    | 7.8 (7.5,<br>8.1)       | 10.2 (9.8,<br>10.6)     | 12.3<br>(11.9,<br>12.8) |
| Emphysema /<br>Chronic bronchitis               | 1.6 (1.1,<br>2.4)       | 1.8 (1.3,<br>2.6)       | 2.0 (1.4,<br>2.7)       | 4.3 (3.8,<br>4.7)       | 4.5 (4.0,<br>5.1)       | 4.4 (3.7,<br>5.1)       | 2.9 (2.5,<br>3.4)       | 2.8<br>(2.4,<br>3.4)    | 2.8<br>(2.4,<br>3.3)    | 6.2 (5.9,<br>6.5)       | 6.5 (6.2,<br>6.9)       | 5.3 (5.0,<br>5.6)       |
| Current smoker, %<br>(95% CI)                   | 14.9<br>(12.9,<br>17.2) | 11.0<br>(9.5,<br>12.7)  | 7.2 (6.0,<br>8.5)       | 23.8<br>(22.6,<br>25.1) | 21.3<br>(20.0,<br>22.7) | 14.7<br>(13.5,<br>16.1) | 18.3<br>(17.4,<br>19.3) | 15.2<br>(14.1,<br>16.2) | 9.8<br>(9.0,<br>10.8)   | 24.2<br>(23.7,<br>24.8) | 22.1<br>(21.4,<br>22.8) | 15.1<br>(14.6,<br>15.7) |
| Flu vaccine in past<br>12 months, % (95%<br>CI) | 26.1<br>(23.3,<br>29.2) | 33.4<br>(31.2,<br>35.7) | 48.2<br>(45.6,<br>50.7) | 20.6<br>(19.7,<br>21.5) | 26.3<br>(25.0,<br>27.7) | 35.2<br>(33.4,<br>37.1) | 18.6<br>(17.5,<br>19.6) | 22.1<br>(20.9,<br>23.2) | 34.9<br>(33.3,<br>36.5) | 30.7<br>(30.0,<br>31.3) | 36.9<br>(36.2,<br>37.6) | 47.1<br>(46.4,<br>47.9) |
|                                                 | <b>Asian</b>            |                         |                         | <b>Black</b>            |                         |                         | <b>Latino/Hispanic</b>  |                         |                         | <b>White</b>            |                         |                         |

|                                                | <b>1999–<br/>2000</b> | <b>2008–<br/>2009</b> | <b>2017–<br/>2018</b> |
|------------------------------------------------|-----------------------|-----------------------|-----------------------|-----------------------|-----------------------|-----------------------|-----------------------|-----------------------|-----------------------|-----------------------|-----------------------|-----------------------|
| Obese (BMI ≥30 kg/m <sup>2</sup> ), % (95% CI) | 6.1 (4.9, 7.7)        | 8.7 (7.1, 10.5)       | 12.0 (10.5, 13.6)     | 29.1 (28.0, 30.2)     | 37.1 (35.8, 38.4)     | 39.4 (37.8, 41.1)     | 23.0 (21.9, 24.1)     | 31.2 (29.9, 32.4)     | 34.0 (32.5, 35.6)     | 20.2 (19.7, 20.6)     | 26.1 (25.4, 26.8)     | 30.3 (29.6, 31.0)     |

Abbreviations: BMI, body mass index; CI, confidence interval; GED, general equivalency diploma; IQR, interquartile range

Legend: All percentages presented are weighted percentages. During the study period, the NHIS used weights derived from different Census-based population estimates: from 1990 Census for years 1999–2002, from 2000 Census for years 2003–2011, and from 2010 Census for years 2012–2018 (Sources: [https://www.cdc.gov/nchs/data/nhis/SHS\\_Tech\\_Notes.pdf](https://www.cdc.gov/nchs/data/nhis/SHS_Tech_Notes.pdf); <https://www.cdc.gov/nchs/data/nhis/srvydesc.pdf>).

Footnotes:

<sup>a</sup> Annual family income was categorized relative to the respective year's of the Federal Poverty Limit from the US Census Bureau into middle/high income (≥200%) and low income (<200%). The weighted proportion of individuals with annual income <200% federal poverty limit was estimated using multiple imputation.

<sup>b</sup> Based on where the housing unit of the survey participant was located. The 4 regions correspond to the regions recognized by the Census Bureau (Source: [https://www2.census.gov/geo/pdfs/maps-data/maps/reference/us\\_regdiv.pdf](https://www2.census.gov/geo/pdfs/maps-data/maps/reference/us_regdiv.pdf)).

**eTable 2. Distribution of the Missing Rates for Measures of Health Status and Health Care Access and Affordability Between 1999 and 2018.**

| Year  | Self-Rated Health Status | Functional Limitation | Psychological Distress | Insurance Status | Usual Source of Care | Seen/Talked to a Health Professional | Foregone or Delayed Care Due to Cost |
|-------|--------------------------|-----------------------|------------------------|------------------|----------------------|--------------------------------------|--------------------------------------|
| 1999  | 0.11%                    | 0.25%                 | 1.41%                  | 0.29%            | 0.50%                | 1.45%                                | 0.97%                                |
| 2000  | 0.10%                    | 0.20%                 | 1.80%                  | 0.55%            | 0.67%                | 1.24%                                | 0.78%                                |
| 2001  | 0.09%                    | 0.31%                 | 2.75%                  | 0.42%            | 0.43%                | 1.02%                                | 0.58%                                |
| 2002  | 0.11%                    | 0.29%                 | 2.26%                  | 0.47%            | 0.66%                | 1.24%                                | 0.71%                                |
| 2003  | 0.13%                    | 0.40%                 | 2.17%                  | 0.47%            | 0.65%                | 1.34%                                | 0.69%                                |
| 2004  | 0.05%                    | 0.29%                 | 2.05%                  | 0.45%            | 0.59%                | 1.40%                                | 0.62%                                |
| 2005  | 0.05%                    | 0.31%                 | 1.79%                  | 0.36%            | 0.88%                | 1.61%                                | 0.93%                                |
| 2006  | 0.08%                    | 0.40%                 | 2.01%                  | 0.45%            | 0.90%                | 1.70%                                | 0.97%                                |
| 2007  | 0.06%                    | 0.83%                 | 1.78%                  | 0.38%            | 1.34%                | 2.15%                                | 1.18%                                |
| 2008  | 0.06%                    | 0.66%                 | 1.26%                  | 0.41%            | 1.21%                | 1.69%                                | 1.21%                                |
| 2009  | 0.03%                    | 0.15%                 | 0.99%                  | 0.32%            | 0.49%                | 0.94%                                | 0.58%                                |
| 2010  | 0.07%                    | 0.36%                 | 0.92%                  | 0.39%            | 1.06%                | 1.64%                                | 1.10%                                |
| 2011  | 0.05%                    | 0.08%                 | 0.80%                  | 0.36%            | 0.33%                | 0.96%                                | 0.46%                                |
| 2012  | 0.06%                    | 0.37%                 | 0.65%                  | 0.35%            | 1.06%                | 1.88%                                | 1.08%                                |
| 2013  | 0.05%                    | 0.04%                 | 3.74%                  | 0.39%            | 0.61%                | 1.45%                                | 0.75%                                |
| 2014  | 0.05%                    | 0.21%                 | 3.59%                  | 0.52%            | 0.83%                | 1.50%                                | 0.86%                                |
| 2015  | 0.03%                    | 0.05%                 | 4.45%                  | 0.61%            | 0.86%                | 1.80%                                | 1.01%                                |
| 2016  | 0.02%                    | 0.09%                 | 3.60%                  | 0.63%            | 0.79%                | 1.52%                                | 0.91%                                |
| 2017  | 0.03%                    | 0.09%                 | 3.66%                  | 0.50%            | 0.62%                | 1.31%                                | 0.76%                                |
| 2018  | 0.04%                    | 0.08%                 | 2.90%                  | 0.50%            | 0.67%                | 1.29%                                | 0.68%                                |
| Total | 0.06%                    | 0.27%                 | 2.26%                  | 0.44%            | 0.76%                | 1.46%                                | 0.84%                                |



**eTable 3. Adjusted Annual Prevalence of Poor/Fair Health Status by Race and Ethnicity, 1999-2018.**

**A. Overall**

| <b>Year</b> | <b>Asian,<br/>% (95% CI)</b> | <b>Black,<br/>% (95% CI)</b> | <b>Latino/Hispanic,<br/>% (95% CI)</b> | <b>White,<br/>% (95% CI)</b> |
|-------------|------------------------------|------------------------------|----------------------------------------|------------------------------|
| 1999        | 10.0 (7.9, 12.6)             | 17.7 (16.1, 19.4)            | 14.3 (13.0, 15.8)                      | 9.4 (8.9, 9.8)               |
| 2000        | 6.6 (4.8, 8.8)               | 17.8 (16.4, 19.2)            | 16.2 (14.8, 17.7)                      | 9.7 (9.3, 10.2)              |
| 2001        | 8.1 (6.4, 10.3)              | 18.9 (17.4, 20.5)            | 15.0 (13.9, 16.2)                      | 10.0 (9.5, 10.5)             |
| 2002        | 8.6 (6.4, 11.4)              | 17.7 (16.3, 19.3)            | 16.0 (14.7, 17.5)                      | 10.3 (9.8, 10.9)             |
| 2003        | 8.6 (6.6, 11.0)              | 18.3 (16.7, 19.9)            | 17.7 (16.4, 19.1)                      | 10.1 (9.6, 10.5)             |
| 2004        | 7.5 (5.8, 9.8)               | 18.8 (17.3, 20.3)            | 15.8 (14.6, 17.2)                      | 10.2 (9.8, 10.7)             |
| 2005        | 6.9 (5.1, 9.2)               | 18.7 (17.3, 20.1)            | 16.7 (15.4, 18.0)                      | 10.1 (9.7, 10.6)             |
| 2006        | 8.1 (6.2, 10.5)              | 18.6 (17.3, 20.0)            | 16.4 (14.9, 18.0)                      | 10.0 (9.5, 10.6)             |
| 2007        | 9.3 (7.3, 11.8)              | 18.8 (17.4, 20.4)            | 16.0 (14.6, 17.4)                      | 11.1 (10.5, 11.7)            |
| 2008        | 7.1 (5.6, 9.0)               | 17.8 (16.0, 19.7)            | 16.6 (14.8, 18.6)                      | 11.0 (10.3, 11.7)            |
| 2009        | 8.1 (6.6, 9.9)               | 18.4 (16.8, 20.1)            | 17.1 (15.5, 18.8)                      | 10.5 (9.9, 11.1)             |
| 2010        | 8.3 (6.9, 10.0)              | 19.1 (17.6, 20.5)            | 16.0 (14.7, 17.4)                      | 10.1 (9.5, 10.6)             |
| 2011        | 9.8 (8.2, 11.6)              | 18.9 (17.6, 20.3)            | 16.1 (14.8, 17.4)                      | 10.7 (10.2, 11.3)            |
| 2012        | 8.1 (6.8, 9.7)               | 19.3 (17.9, 20.9)            | 17.1 (15.9, 18.4)                      | 9.9 (9.3, 10.4)              |
| 2013        | 9.2 (7.7, 11.1)              | 18.4 (17.0, 19.9)            | 16.1 (14.7, 17.6)                      | 10.6 (10.1, 11.1)            |
| 2014        | 7.5 (6.0, 9.2)               | 17.0 (15.7, 18.3)            | 15.2 (14.1, 16.4)                      | 9.9 (9.3, 10.4)              |
| 2015        | 7.0 (5.6, 8.8)               | 17.1 (15.8, 18.5)            | 15.1 (13.8, 16.4)                      | 10.1 (9.6, 10.6)             |
| 2016        | 7.7 (6.0, 9.7)               | 17.1 (15.2, 19.0)            | 15.9 (14.2, 17.7)                      | 9.8 (9.3, 10.4)              |
| 2017        | 8.1 (6.7, 9.9)               | 16.5 (14.8, 18.4)            | 15.0 (13.3, 16.8)                      | 9.7 (9.2, 10.3)              |
| 2018        | 8.1 (6.5, 9.8)               | 15.6 (14.0, 17.4)            | 14.7 (13.2, 16.4)                      | 9.6 (9.1, 10.1)              |

Abbreviation: CI, confidence interval.

**B. By Income-Level**

| Year | Asian,<br>% (95% CI) |                    | Black,<br>% (95% CI) |                    | Latino/Hispanic,<br>% (95% CI) |                    | White,<br>% (95% CI) |                    |
|------|----------------------|--------------------|----------------------|--------------------|--------------------------------|--------------------|----------------------|--------------------|
|      | Low income           | Middle/high income | Low income           | Middle/high income | Low income                     | Middle/high income | Low income           | Middle/high income |
| 1999 | 19.1 (13.1, 27.1)    | 6.4 (4.1, 10.1)    | 29.1 (26.5, 31.7)    | 8.5 (6.8, 10.5)    | 19.3 (17.3, 21.6)              | 9.6 (8.1, 11.3)    | 19.6 (18.4, 20.8)    | 6.4 (5.9, 6.8)     |
| 2000 | 10.0 (6.1, 15.9)     | 5.3 (3.5, 7.8)     | 26.7 (24.5, 29.1)    | 10.8 (9.2, 12.7)   | 21.5 (19.5, 23.5)              | 10.9 (9.2, 13.0)   | 19.4 (18.1, 20.6)    | 6.6 (6.2, 7.1)     |
| 2001 | 11.8 (8.3, 16.6)     | 6.8 (4.8, 9.6)     | 29.2 (26.8, 31.8)    | 11.0 (9.6, 12.7)   | 19.4 (17.8, 21.2)              | 10.2 (8.7, 12.0)   | 19.9 (18.7, 21.2)    | 6.9 (6.5, 7.4)     |
| 2002 | 13.1 (8.8, 18.9)     | 6.9 (4.5, 10.3)    | 27.6 (25.2, 30.2)    | 10.6 (9.2, 12.2)   | 22.3 (20.3, 24.4)              | 10.5 (8.8, 12.4)   | 20.4 (19.1, 21.8)    | 7.1 (6.7, 7.6)     |
| 2003 | 15.5 (10.6, 22.0)    | 5.7 (3.8, 8.5)     | 28.7 (26.4, 31.1)    | 10.6 (8.9, 12.7)   | 23.5 (21.5, 25.5)              | 11.6 (10.0, 13.5)  | 20.4 (19.1, 21.8)    | 6.7 (6.3, 7.1)     |
| 2004 | 14.6 (10.3, 20.3)    | 5.0 (3.4, 7.3)     | 29.7 (27.3, 32.4)    | 10.4 (9.0, 12.0)   | 21.5 (19.6, 23.5)              | 9.9 (8.5, 11.6)    | 21.3 (20.0, 22.7)    | 6.7 (6.3, 7.1)     |
| 2005 | 14.6 (10.1, 20.8)    | 4.5 (3.0, 6.6)     | 27.3 (24.9, 29.8)    | 11.9 (10.3, 13.7)  | 21.9 (20.0, 23.8)              | 11.4 (9.8, 13.3)   | 20.4 (19.2, 21.7)    | 6.8 (6.4, 7.3)     |
| 2006 | 13.9 (9.6, 19.8)     | 5.9 (4.3, 8.1)     | 27.0 (24.8, 29.4)    | 11.6 (9.8, 13.5)   | 22.4 (20.0, 24.9)              | 10.4 (8.7, 12.3)   | 20.2 (18.7, 21.8)    | 6.6 (6.1, 7.2)     |
| 2007 | 15.0 (10.1, 21.8)    | 7.0 (5.1, 9.5)     | 28.7 (26.3, 31.3)    | 11.7 (9.9, 13.7)   | 22.8 (20.5, 25.3)              | 9.9 (8.3, 11.8)    | 23.3 (21.6, 25.1)    | 7.3 (6.8, 7.9)     |
| 2008 | 13.6 (9.5, 19.1)     | 4.9 (3.6, 6.7)     | 28.8 (25.7, 32.2)    | 10.1 (8.6, 11.9)   | 24.3 (21.3, 27.6)              | 9.9 (8.2, 11.9)    | 24.2 (22.2, 26.3)    | 7.0 (6.4, 7.6)     |
| 2009 | 14.6 (11.1, 19.0)    | 5.9 (4.3, 8.1)     | 28.4 (25.6, 31.4)    | 10.6 (9.2, 12.3)   | 23.5 (20.8, 26.4)              | 11.1 (9.5, 12.9)   | 22.8 (21.1, 24.5)    | 6.7 (6.1, 7.2)     |
| 2010 | 13.7 (10.6, 17.5)    | 6.3 (4.9, 8.1)     | 29.2 (26.8, 31.9)    | 10.5 (9.2, 12.0)   | 21.9 (19.9, 24.1)              | 10.0 (8.5, 11.7)   | 21.9 (20.4, 23.4)    | 6.2 (5.7, 6.6)     |
| 2011 | 18.2 (14.9, 22.2)    | 6.1 (4.7, 7.9)     | 30.5 (28.3, 32.8)    | 9.9 (8.7, 11.3)    | 21.6 (19.5, 23.8)              | 10.1 (8.7, 11.6)   | 22.3 (21.1, 23.6)    | 6.9 (6.4, 7.5)     |
| 2012 | 15.8 (12.4, 19.8)    | 5.1 (3.9, 6.6)     | 29.0 (26.4, 31.7)    | 11.4 (9.9, 13.0)   | 23.0 (21.1, 25.0)              | 10.4 (8.8, 12.2)   | 22.4 (20.9, 24.0)    | 5.8 (5.4, 6.3)     |
| 2013 | 17.1 (13.1, 21.8)    | 6.1 (4.6, 8.1)     | 29.6 (27.2, 32.1)    | 9.0 (7.7, 10.5)    | 22.8 (20.8, 25.0)              | 9.6 (8.0, 11.4)    | 22.7 (21.3, 24.2)    | 6.6 (6.2, 7.1)     |
| 2014 | 15.4 (11.6, 20.3)    | 4.4 (3.3, 5.9)     | 26.6 (24.7, 28.7)    | 8.5 (7.0, 10.3)    | 20.5 (18.8, 22.2)              | 9.8 (8.3, 11.5)    | 22.3 (21.0, 23.7)    | 6.0 (5.5, 6.5)     |
| 2015 | 15.3 (11.5, 20.3)    | 4.4 (3.1, 6.1)     | 26.8 (24.5, 29.3)    | 9.7 (8.4, 11.3)    | 21.9 (19.8, 24.1)              | 8.5 (7.1, 10.1)    | 21.7 (20.4, 23.2)    | 6.5 (6.1, 7.1)     |
| 2016 | 15.7 (11.2, 21.6)    | 5.0 (3.5, 7.0)     | 27.6 (24.9, 30.6)    | 9.6 (7.6, 12.1)    | 22.0 (19.3, 25.0)              | 10.4 (8.6, 12.4)   | 22.7 (21.2, 24.2)    | 6.2 (5.7, 6.6)     |
| 2017 | 14.7 (11.3, 18.8)    | 5.8 (4.4, 7.7)     | 27.2 (24.4, 30.3)    | 8.7 (7.1, 10.5)    | 21.2 (18.5, 24.2)              | 9.4 (7.7, 11.5)    | 22.8 (21.3, 24.4)    | 6.2 (5.8, 6.7)     |
| 2018 | 14.1 (10.4, 18.7)    | 6.0 (4.5, 7.9)     | 24.9 (21.8, 28.3)    | 9.0 (7.5, 10.7)    | 20.4 (17.8, 23.3)              | 9.8 (8.3, 11.6)    | 22.1 (20.6, 23.7)    | 6.3 (5.8, 6.7)     |

Abbreviation: CI, confidence interval.

**eTable 4. Comparison of our Age-Adjusted Trends in Poor/Fair Health Status, Estimated Using Direct Standardization, with Estimates from the National Center for Health Statistics Report.**

|                                                                                                                                                                                                                                                                                                                                                                                                     | Estimates Using Direct Standardization                                                                                              |      |      |      |      |      |      |      |      |      |      |      |      |      |      |      |
|-----------------------------------------------------------------------------------------------------------------------------------------------------------------------------------------------------------------------------------------------------------------------------------------------------------------------------------------------------------------------------------------------------|-------------------------------------------------------------------------------------------------------------------------------------|------|------|------|------|------|------|------|------|------|------|------|------|------|------|------|
|                                                                                                                                                                                                                                                                                                                                                                                                     | Percentage with Poor or Fair Health, Age-Adjusted Estimates                                                                         |      |      |      |      |      |      |      |      |      |      |      |      |      |      |      |
|                                                                                                                                                                                                                                                                                                                                                                                                     | 1999                                                                                                                                | 2000 | 2001 | 2002 | 2003 | 2004 | 2005 | 2006 | 2007 | 2008 | 2009 | 2010 | 2011 | 2012 | 2013 | 2014 |
| Non-Hispanic White                                                                                                                                                                                                                                                                                                                                                                                  | 7.3                                                                                                                                 | 7.6  | 7.8  | 7.9  | 7.8  | 7.9  | 7.9  | 8.0  | 8.9  | 9.0  | 8.7  | 8.2  | 8.8  | 8.3  | 8.3  | 8.2  |
| Non-Hispanic Black                                                                                                                                                                                                                                                                                                                                                                                  | 14.5                                                                                                                                | 13.9 | 14.6 | 13.9 | 14.5 | 14.8 | 14.8 | 14.8 | 14.5 | 14.2 | 14.3 | 15.7 | 15.2 | 15.3 | 14.8 | 13.8 |
| Non-Hispanic Asian                                                                                                                                                                                                                                                                                                                                                                                  | 7.4                                                                                                                                 | 5.5  | 7.2  | 6.4  | 6.6  | 6.6  | 6.1  | 7.3  | 8.3  | 6.0  | 6.9  | 7.0  | 8.4  | 7.0  | 7.9  | 7.1  |
| Latino/Hispanic                                                                                                                                                                                                                                                                                                                                                                                     | 12.1                                                                                                                                | 13.0 | 12.0 | 12.9 | 14.2 | 12.7 | 13.3 | 13.1 | 13.0 | 13.0 | 13.9 | 12.8 | 12.9 | 13.6 | 13.1 | 12.0 |
|                                                                                                                                                                                                                                                                                                                                                                                                     | <b>Estimates from NCHS: Health, United States, 2015: With Special Feature on Racial and Ethnic Health Disparities. <sup>a</sup></b> |      |      |      |      |      |      |      |      |      |      |      |      |      |      |      |
|                                                                                                                                                                                                                                                                                                                                                                                                     | Percent with Poor or Fair Health, Age-Adjusted Estimates                                                                            |      |      |      |      |      |      |      |      |      |      |      |      |      |      |      |
|                                                                                                                                                                                                                                                                                                                                                                                                     | 1999                                                                                                                                | 2000 | 2001 | 2002 | 2003 | 2004 | 2005 | 2006 | 2007 | 2008 | 2009 | 2010 | 2011 | 2012 | 2013 | 2014 |
| Not Hispanic or Latino                                                                                                                                                                                                                                                                                                                                                                              |                                                                                                                                     |      |      |      |      |      |      |      |      |      |      |      |      |      |      |      |
| White only                                                                                                                                                                                                                                                                                                                                                                                          | 7.7                                                                                                                                 | 7.9  | 7.9  | 8.2  | 7.9  | 8.0  | 8.0  | 8.0  | 8.3  | 8.4  | 8.0  | 8.2  | 8.4  | 8.1  | 8.2  | 7.7  |
| Black or African American only                                                                                                                                                                                                                                                                                                                                                                      | 14.6                                                                                                                                | 14.6 | 15.5 | 14.0 | 14.6 | 14.6 | 14.4 | 14.4 | 14.1 | 14.6 | 14.2 | 14.9 | 15.0 | 15.0 | 14.2 | 13.6 |
| Hispanic or Latino                                                                                                                                                                                                                                                                                                                                                                                  | 11.9                                                                                                                                | 12.8 | 12.6 | 13.1 | 13.9 | 13.3 | 13.3 | 13.0 | 13.0 | 12.8 | 13.3 | 13.1 | 13.2 | 13.3 | 12.7 | 12.2 |
| <sup>a</sup> Source: National Center for Health Statistics (US). Health, United States, 2015: With Special Feature on Racial and Ethnic Health Disparities. Hyattsville (MD): National Center for Health Statistics (US); 2016 May. Appendix II, Definitions and Methods. Available from: <a href="https://www.ncbi.nlm.nih.gov/books/NBK367638/">https://www.ncbi.nlm.nih.gov/books/NBK367638/</a> |                                                                                                                                     |      |      |      |      |      |      |      |      |      |      |      |      |      |      |      |

**eTable 5. Adjusted Annual Prevalence of Functional Limitation by Race and Ethnicity, 1999-2018.**

**A. Overall**

| <b>Year</b> | <b>Asian,<br/>% (95% CI)</b> | <b>Black,<br/>% (95% CI)</b> | <b>Latino/Hispanic,<br/>% (95% CI)</b> | <b>White,<br/>% (95% CI)</b> |
|-------------|------------------------------|------------------------------|----------------------------------------|------------------------------|
| 1999        | 19.0 (16.1, 22.4)            | 29.4 (27.4, 31.5)            | 22.5 (20.9, 24.3)                      | 29.7 (28.9, 30.6)            |
| 2000        | 17.3 (14.1, 21.1)            | 31.0 (29.2, 32.8)            | 25.6 (23.9, 27.2)                      | 32.1 (31.1, 33.1)            |
| 2001        | 20.5 (16.9, 24.6)            | 36.4 (34.4, 38.4)            | 27.4 (25.6, 29.3)                      | 35.7 (34.8, 36.6)            |
| 2002        | 20.1 (17.0, 23.7)            | 33.0 (31.0, 35.0)            | 26.1 (24.3, 28.0)                      | 32.3 (31.4, 33.3)            |
| 2003        | 20.4 (17.2, 24.0)            | 32.3 (30.4, 34.3)            | 27.2 (25.6, 29.0)                      | 32.6 (31.6, 33.6)            |
| 2004        | 22.9 (19.5, 26.7)            | 33.2 (31.4, 35.2)            | 28.4 (26.7, 30.1)                      | 34.4 (33.5, 35.3)            |
| 2005        | 21.2 (18.2, 24.7)            | 35.2 (33.1, 37.3)            | 30.1 (28.3, 31.9)                      | 34.1 (33.2, 35.1)            |
| 2006        | 19.2 (16.3, 22.5)            | 34.6 (32.2, 37.1)            | 28.4 (26.5, 30.4)                      | 33.7 (32.6, 34.7)            |
| 2007        | 16.7 (14.1, 19.6)            | 33.0 (31.0, 35.1)            | 25.5 (23.5, 27.6)                      | 32.8 (31.8, 33.9)            |
| 2008        | 17.9 (15.2, 21.0)            | 33.7 (31.5, 35.9)            | 30.7 (28.5, 32.9)                      | 33.8 (32.6, 35.0)            |
| 2009        | 19.0 (16.3, 21.9)            | 38.1 (35.7, 40.6)            | 31.8 (29.7, 33.9)                      | 36.3 (35.2, 37.4)            |
| 2010        | 20.8 (18.2, 23.7)            | 37.8 (35.8, 39.9)            | 35.0 (33.0, 37.0)                      | 36.9 (35.8, 37.9)            |
| 2011        | 21.9 (19.5, 24.5)            | 40.1 (38.0, 42.1)            | 33.5 (31.9, 35.2)                      | 37.4 (36.4, 38.4)            |
| 2012        | 20.4 (17.9, 23.0)            | 36.8 (34.8, 38.9)            | 31.3 (29.7, 33.0)                      | 35.5 (34.5, 36.5)            |
| 2013        | 19.2 (17.2, 21.4)            | 38.2 (36.2, 40.2)            | 29.2 (27.5, 30.9)                      | 35.2 (34.2, 36.3)            |
| 2014        | 17.6 (15.6, 19.8)            | 36.5 (34.6, 38.5)            | 29.2 (27.5, 30.9)                      | 34.0 (32.9, 35.1)            |
| 2015        | 21.5 (18.8, 24.6)            | 38.0 (36.0, 40.0)            | 31.6 (29.8, 33.5)                      | 35.6 (34.7, 36.6)            |
| 2016        | 25.0 (20.9, 29.4)            | 39.4 (36.9, 42.0)            | 34.0 (31.5, 36.4)                      | 37.8 (36.7, 38.9)            |
| 2017        | 22.3 (19.1, 25.9)            | 38.5 (35.9, 41.2)            | 33.2 (30.6, 35.7)                      | 37.7 (36.5, 38.9)            |
| 2018        | 23.9 (21.0, 27.0)            | 38.7 (36.1, 41.5)            | 32.9 (30.4, 35.4)                      | 38.4 (37.2, 39.5)            |

Abbreviation: CI, confidence interval.

**B. By Income-Level**

| Year | Asian,<br>% (95% CI) |                    | Black,<br>% (95% CI) |                    | Latino/Hispanic,<br>% (95% CI) |                    | White,<br>% (95% CI) |                    |
|------|----------------------|--------------------|----------------------|--------------------|--------------------------------|--------------------|----------------------|--------------------|
|      | Low income           | Middle/high income | Low income           | Middle/high income | Low income                     | Middle/high income | Low income           | Middle/high income |
| 1999 | 24.0 (18.3, 30.9)    | 17.1 (13.7, 21.1)  | 40.1 (37.2, 43.1)    | 21.3 (19.1, 23.9)  | 24.7 (22.2, 27.4)              | 20.5 (18.4, 22.8)  | 41.7 (39.8, 43.5)    | 26.4 (25.5, 27.3)  |
| 2000 | 28.0 (21.1, 36.3)    | 13.5 (10.5, 17.2)  | 39.8 (37.0, 42.7)    | 24.7 (22.2, 27.3)  | 29.7 (27.4, 32.1)              | 21.6 (19.4, 23.9)  | 44.4 (42.5, 46.3)    | 28.5 (27.4, 29.5)  |
| 2001 | 26.9 (20.3, 34.8)    | 18.3 (14.5, 22.8)  | 44.9 (42.1, 47.6)    | 30.6 (27.8, 33.5)  | 30.3 (27.9, 32.8)              | 24.4 (22.0, 26.9)  | 46.6 (44.7, 48.5)    | 32.6 (31.7, 33.6)  |
| 2002 | 19.8 (14.4, 26.8)    | 20.1 (16.5, 24.3)  | 41.3 (38.1, 44.5)    | 27.5 (25.1, 30.1)  | 29.9 (27.5, 32.5)              | 22.8 (20.2, 25.6)  | 42.8 (40.8, 44.7)    | 29.2 (28.2, 30.2)  |
| 2003 | 21.7 (15.7, 29.4)    | 19.7 (16.4, 23.6)  | 42.1 (39.0, 45.2)    | 25.7 (23.3, 28.3)  | 30.9 (28.6, 33.4)              | 23.6 (21.2, 26.0)  | 45.0 (43.2, 46.8)    | 28.8 (27.8, 29.9)  |
| 2004 | 30.0 (22.2, 39.5)    | 20.3 (16.9, 24.2)  | 42.1 (39.2, 44.9)    | 27.1 (24.7, 29.7)  | 31.9 (29.7, 34.3)              | 24.8 (22.5, 27.3)  | 46.7 (44.9, 48.5)    | 30.7 (29.7, 31.7)  |
| 2005 | 28.0 (22.1, 34.7)    | 19.2 (15.6, 23.4)  | 45.0 (41.8, 48.2)    | 28.1 (25.8, 30.5)  | 34.4 (31.9, 36.8)              | 25.8 (23.6, 28.1)  | 48.3 (46.4, 50.1)    | 29.9 (28.9, 30.9)  |
| 2006 | 26.2 (20.6, 32.5)    | 16.7 (13.5, 20.5)  | 43.7 (40.4, 47.1)    | 27.5 (24.2, 31.1)  | 33.0 (29.9, 36.1)              | 24.0 (21.4, 26.8)  | 46.3 (44.1, 48.6)    | 29.6 (28.4, 30.8)  |
| 2007 | 24.0 (17.7, 31.8)    | 13.8 (11.1, 17.0)  | 44.4 (41.1, 47.6)    | 25.2 (22.8, 27.7)  | 30.3 (27.5, 33.4)              | 21.3 (18.7, 24.2)  | 47.2 (44.9, 49.6)    | 28.6 (27.5, 29.8)  |
| 2008 | 23.6 (16.7, 32.2)    | 16.1 (13.4, 19.2)  | 45.1 (42.1, 48.2)    | 26.1 (23.2, 29.3)  | 36.3 (33.0, 39.7)              | 25.8 (22.9, 28.9)  | 49.1 (46.7, 51.7)    | 29.4 (28.1, 30.7)  |
| 2009 | 24.5 (19.2, 30.8)    | 17.1 (14.1, 20.6)  | 48.2 (44.9, 51.7)    | 30.8 (27.8, 33.9)  | 36.4 (33.4, 39.4)              | 27.6 (24.6, 30.8)  | 50.0 (47.7, 52.3)    | 32.1 (31.0, 33.3)  |
| 2010 | 26.3 (21.7, 31.6)    | 18.8 (15.9, 22.1)  | 46.7 (43.8, 49.7)    | 30.8 (28.2, 33.5)  | 38.2 (35.6, 40.9)              | 31.9 (29.1, 34.8)  | 51.7 (49.6, 53.7)    | 32.1 (31.0, 33.2)  |
| 2011 | 28.9 (24.4, 33.8)    | 18.9 (16.2, 21.9)  | 51.2 (48.3, 54.1)    | 31.6 (29.2, 34.0)  | 37.0 (34.8, 39.3)              | 30.0 (27.6, 32.5)  | 53.1 (51.3, 54.8)    | 32.3 (31.2, 33.4)  |
| 2012 | 27.1 (22.4, 32.2)    | 17.8 (14.9, 21.0)  | 47.0 (43.9, 50.2)    | 28.9 (26.4, 31.4)  | 35.4 (33.0, 37.9)              | 27.0 (24.4, 29.7)  | 50.3 (48.3, 52.3)    | 30.7 (29.7, 31.8)  |
| 2013 | 26.8 (22.6, 31.3)    | 16.2 (14.0, 18.7)  | 49.2 (46.1, 52.3)    | 29.2 (26.8, 31.7)  | 35.5 (33.2, 37.9)              | 22.9 (20.9, 25.1)  | 51.5 (49.5, 53.5)    | 30.0 (28.9, 31.1)  |
| 2014 | 24.2 (20.0, 29.0)    | 15.2 (13.0, 17.6)  | 47.3 (44.7, 50.0)    | 27.2 (24.6, 29.9)  | 32.7 (30.5, 35.0)              | 25.6 (23.2, 28.1)  | 50.0 (47.8, 52.1)    | 29.1 (27.9, 30.3)  |
| 2015 | 31.6 (25.5, 38.3)    | 18.5 (15.5, 21.8)  | 47.4 (44.3, 50.4)    | 31.2 (28.8, 33.8)  | 35.9 (33.5, 38.4)              | 27.5 (25.0, 30.0)  | 51.6 (49.7, 53.5)    | 30.9 (29.8, 32.0)  |
| 2016 | 36.5 (28.5, 45.3)    | 21.2 (17.3, 25.6)  | 51.1 (47.7, 54.3)    | 31.4 (28.2, 34.7)  | 40.2 (36.8, 43.6)              | 28.4 (25.5, 31.5)  | 54.5 (52.5, 56.4)    | 33.0 (31.8, 34.2)  |
| 2017 | 27.3 (21.8, 33.5)    | 20.7 (17.1, 24.9)  | 50.2 (46.6, 53.8)    | 30.0 (26.8, 33.5)  | 38.5 (35.2, 41.9)              | 28.4 (24.6, 32.4)  | 54.0 (51.9, 56.1)    | 33.4 (32.2, 34.6)  |
| 2018 | 35.1 (28.6, 42.0)    | 20.4 (17.4, 23.8)  | 48.9 (44.7, 53.1)    | 31.8 (28.6, 35.2)  | 37.3 (34.0, 40.7)              | 29.1 (25.9, 32.5)  | 57.0 (54.8, 59.2)    | 33.6 (32.4, 34.8)  |

Abbreviation: CI, confidence interval.

**eTable 6. Adjusted Annual Prevalence of Severe Psychological Distress by Race and Ethnicity, 1999-2018.**

**A. Overall**

| <b>Year</b> | <b>Asian,<br/>% (95% CI)</b> | <b>Black,<br/>% (95% CI)</b> | <b>Latino/Hispanic,<br/>% (95% CI)</b> | <b>White,<br/>% (95% CI)</b> |
|-------------|------------------------------|------------------------------|----------------------------------------|------------------------------|
| 1999        | 0.8 (0.4, 1.5)               | 3.0 (2.5, 3.7)               | 3.2 (2.6, 3.8)                         | 2.3 (2.0, 2.5)               |
| 2000        | 1.8 (1.1, 3.1)               | 2.7 (2.2, 3.2)               | 3.7 (3.1, 4.4)                         | 2.6 (2.4, 2.9)               |
| 2001        | 1.7 (0.8, 3.4)               | 3.5 (2.9, 4.2)               | 4.2 (3.6, 4.9)                         | 3.1 (2.8, 3.4)               |
| 2002        | 1.6 (0.7, 3.6)               | 3.9 (3.2, 4.7)               | 3.7 (3.1, 4.5)                         | 2.9 (2.7, 3.2)               |
| 2003        | 2.2 (1.3, 3.9)               | 3.3 (2.7, 4.0)               | 4.0 (3.4, 4.6)                         | 3.1 (2.8, 3.4)               |
| 2004        | 1.4 (0.8, 2.4)               | 3.5 (2.9, 4.1)               | 3.8 (3.2, 4.4)                         | 3.1 (2.8, 3.4)               |
| 2005        | 1.8 (1.2, 2.9)               | 3.8 (3.2, 4.5)               | 3.8 (3.3, 4.5)                         | 2.8 (2.6, 3.1)               |
| 2006        | 2.7 (1.9, 3.9)               | 3.9 (3.1, 4.7)               | 3.0 (2.4, 3.8)                         | 2.9 (2.6, 3.2)               |
| 2007        | 1.3 (0.8, 2.3)               | 2.9 (2.4, 3.6)               | 3.5 (2.9, 4.3)                         | 2.6 (2.3, 3.0)               |
| 2008        | 0.3 (0.2, 0.8)               | 3.6 (2.9, 4.4)               | 3.8 (3.2, 4.6)                         | 3.2 (2.9, 3.6)               |
| 2009        | 1.9 (1.0, 3.6)               | 4.2 (3.5, 5.1)               | 3.5 (2.8, 4.4)                         | 3.1 (2.8, 3.5)               |
| 2010        | 1.3 (0.8, 2.1)               | 3.9 (3.3, 4.6)               | 4.0 (3.3, 4.7)                         | 3.3 (3.0, 3.6)               |
| 2011        | 1.9 (1.3, 2.6)               | 3.9 (3.3, 4.6)               | 4.0 (3.5, 4.6)                         | 3.3 (3.1, 3.6)               |
| 2012        | 1.8 (1.2, 2.9)               | 3.2 (2.6, 3.8)               | 3.5 (2.9, 4.1)                         | 3.0 (2.7, 3.4)               |
| 2013        | 2.2 (1.5, 3.3)               | 3.8 (3.2, 4.5)               | 4.3 (3.7, 5.0)                         | 3.9 (3.6, 4.3)               |
| 2014        | 1.7 (1.1, 2.4)               | 3.5 (2.8, 4.3)               | 5.0 (4.3, 5.7)                         | 2.8 (2.5, 3.1)               |
| 2015        | 1.5 (0.9, 2.3)               | 3.6 (2.8, 4.6)               | 4.3 (3.6, 5.1)                         | 3.5 (3.2, 3.9)               |
| 2016        | 1.9 (1.1, 3.0)               | 3.8 (3.1, 4.7)               | 3.5 (2.8, 4.4)                         | 3.7 (3.4, 4.1)               |
| 2017        | 1.0 (0.6, 1.7)               | 3.6 (2.8, 4.4)               | 3.7 (2.9, 4.6)                         | 3.5 (3.1, 3.9)               |
| 2018        | 2.0 (1.2, 3.2)               | 4.3 (3.3, 5.6)               | 4.7 (3.9, 5.7)                         | 3.8 (3.4, 4.2)               |

Abbreviation: CI, confidence interval.

**B. By Income-Level**

| Year | Asian,<br>% (95% CI) |                       | Black,<br>% (95% CI) |                       | Latino/Hispanic,<br>% (95% CI) |                       | White,<br>% (95% CI) |                       |
|------|----------------------|-----------------------|----------------------|-----------------------|--------------------------------|-----------------------|----------------------|-----------------------|
|      | Low income           | Middle/high<br>income | Low income           | Middle/high<br>income | Low income                     | Middle/high<br>income | Low income           | Middle/high<br>income |
| 1999 | 1.6 (0.6, 4.1)       | 0.5 (0.1, 1.6)        | 5.0 (4.1, 6.2)       | 1.4 (0.9, 2.3)        | 4.3 (3.5, 5.2)                 | 2.1 (1.4, 3.0)        | 4.9 (4.3, 5.6)       | 1.5 (1.3, 1.7)        |
| 2000 | 2.7 (1.3, 5.6)       | 1.5 (0.7, 3.0)        | 4.4 (3.6, 5.5)       | 1.4 (0.9, 2.0)        | 5.3 (4.4, 6.3)                 | 2.0 (1.5, 2.8)        | 5.6 (4.9, 6.3)       | 1.8 (1.5, 2.0)        |
| 2001 | 1.3 (0.4, 3.4)       | 1.8 (0.8, 3.9)        | 6.0 (4.9, 7.5)       | 1.6 (1.1, 2.3)        | 5.7 (4.7, 6.8)                 | 2.6 (1.9, 3.6)        | 6.6 (5.9, 7.5)       | 2.1 (1.8, 2.3)        |
| 2002 | 1.9 (0.7, 4.8)       | 1.5 (0.5, 4.3)        | 6.1 (4.7, 7.9)       | 2.2 (1.6, 3.1)        | 5.3 (4.2, 6.7)                 | 2.2 (1.6, 3.1)        | 6.2 (5.5, 7.0)       | 2.0 (1.7, 2.2)        |
| 2003 | 1.9 (0.9, 4.0)       | 2.3 (1.1, 4.7)        | 5.9 (4.7, 7.5)       | 1.3 (0.9, 2.0)        | 5.5 (4.6, 6.5)                 | 2.3 (1.7, 3.2)        | 7.2 (6.3, 8.1)       | 1.8 (1.6, 2.1)        |
| 2004 | 3.6 (1.9, 6.9)       | 0.5 (0.2, 1.3)        | 5.7 (4.6, 7.0)       | 1.8 (1.3, 2.4)        | 5.2 (4.3, 6.3)                 | 2.2 (1.6, 3.0)        | 7.0 (6.2, 7.8)       | 1.8 (1.6, 2.1)        |
| 2005 | 3.7 (2.1, 6.6)       | 1.2 (0.6, 2.2)        | 6.5 (5.3, 7.8)       | 1.6 (1.0, 2.4)        | 5.0 (4.2, 5.9)                 | 2.5 (1.9, 3.4)        | 6.5 (5.8, 7.3)       | 1.7 (1.4, 1.9)        |
| 2006 | 5.0 (2.9, 8.6)       | 1.9 (1.1, 3.1)        | 6.2 (4.8, 7.9)       | 1.9 (1.4, 2.7)        | 3.2 (2.5, 4.1)                 | 2.7 (1.8, 4.1)        | 6.7 (5.9, 7.6)       | 1.6 (1.4, 1.9)        |
| 2007 | 2.6 (1.3, 5.4)       | 0.8 (0.4, 1.7)        | 4.8 (3.9, 6.1)       | 1.5 (1.0, 2.4)        | 4.9 (3.9, 6.1)                 | 2.2 (1.5, 3.2)        | 6.3 (5.4, 7.4)       | 1.5 (1.2, 1.8)        |
| 2008 | 1.2 (0.5, 2.7)       | 0.1 (0.0, 0.4)        | 5.1 (4.1, 6.5)       | 2.5 (1.8, 3.5)        | 6.4 (5.1, 7.9)                 | 1.5 (1.0, 2.3)        | 7.6 (6.6, 8.7)       | 1.9 (1.6, 2.3)        |
| 2009 | 2.2 (1.2, 4.0)       | 1.7 (0.7, 4.1)        | 6.3 (5.1, 7.8)       | 2.6 (1.8, 3.7)        | 5.5 (4.3, 7.2)                 | 1.4 (1.0, 2.1)        | 7.0 (6.2, 7.9)       | 1.9 (1.6, 2.2)        |
| 2010 | 2.0 (1.1, 3.7)       | 1.0 (0.5, 1.9)        | 6.1 (5.1, 7.3)       | 1.9 (1.3, 2.7)        | 5.1 (4.2, 6.3)                 | 2.7 (1.9, 3.7)        | 6.8 (6.0, 7.6)       | 2.1 (1.8, 2.4)        |
| 2011 | 3.0 (1.9, 4.6)       | 1.3 (0.8, 2.3)        | 6.5 (5.4, 7.7)       | 1.7 (1.1, 2.6)        | 5.8 (4.9, 6.7)                 | 2.0 (1.4, 2.7)        | 7.1 (6.4, 8.0)       | 2.0 (1.8, 2.4)        |
| 2012 | 3.4 (2.0, 5.6)       | 1.2 (0.5, 2.6)        | 5.1 (4.1, 6.3)       | 1.5 (1.0, 2.3)        | 4.8 (4.0, 5.8)                 | 1.8 (1.3, 2.6)        | 7.0 (6.1, 8.0)       | 1.6 (1.4, 1.9)        |
| 2013 | 3.0 (1.8, 5.1)       | 1.8 (1.0, 3.2)        | 6.3 (5.3, 7.5)       | 1.7 (1.1, 2.6)        | 5.9 (5.1, 6.9)                 | 2.6 (1.9, 3.5)        | 9.4 (8.5, 10.5)      | 2.1 (1.7, 2.4)        |
| 2014 | 3.5 (2.2, 5.5)       | 0.9 (0.5, 1.7)        | 5.2 (4.1, 6.4)       | 2.0 (1.3, 3.0)        | 7.0 (5.9, 8.2)                 | 2.7 (2.0, 3.7)        | 6.4 (5.7, 7.2)       | 1.6 (1.4, 1.9)        |
| 2015 | 2.8 (1.6, 4.8)       | 1.0 (0.5, 2.0)        | 5.3 (4.1, 7.0)       | 2.2 (1.4, 3.5)        | 5.5 (4.5, 6.6)                 | 3.0 (2.2, 4.1)        | 8.2 (7.2, 9.3)       | 2.1 (1.8, 2.5)        |
| 2016 | 3.4 (2.0, 5.7)       | 1.3 (0.5, 3.0)        | 6.1 (4.8, 7.6)       | 2.1 (1.4, 3.3)        | 5.2 (4.0, 6.7)                 | 1.9 (1.2, 3.2)        | 9.2 (8.2, 10.4)      | 2.1 (1.8, 2.4)        |
| 2017 | 1.9 (0.9, 4.1)       | 0.7 (0.4, 1.3)        | 5.8 (4.6, 7.3)       | 1.9 (1.1, 3.0)        | 5.0 (3.9, 6.5)                 | 2.4 (1.5, 3.5)        | 8.6 (7.6, 9.7)       | 2.1 (1.8, 2.4)        |
| 2018 | 3.2 (1.7, 5.8)       | 1.5 (0.7, 3.1)        | 7.1 (5.4, 9.4)       | 2.2 (1.4, 3.4)        | 6.4 (5.2, 7.9)                 | 3.2 (2.2, 4.6)        | 8.6 (7.5, 9.8)       | 2.5 (2.1, 2.9)        |

Abbreviation: CI, confidence interval.

**eTable 7. Adjusted Trends in Poor/Fair Health Status, Functional Limitation, and Severe Psychological Distress, by Race and Ethnicity, Using Autoregressive Model, 1999–2018.**

| Outcome                                                                                                                                                                                                                                                                                                                                                                                                                                                                                                                                                 | Asian<br>Percentage points <sup>a, b</sup><br>(95% CI), p value | Black<br>Percentage points <sup>a, b</sup> (95%<br>CI), p value | Latino/Hispanic<br>Percentage points <sup>a, b</sup> (95%<br>CI), p value | White<br>Percentage points <sup>a, b</sup> (95%<br>CI), p value |
|---------------------------------------------------------------------------------------------------------------------------------------------------------------------------------------------------------------------------------------------------------------------------------------------------------------------------------------------------------------------------------------------------------------------------------------------------------------------------------------------------------------------------------------------------------|-----------------------------------------------------------------|-----------------------------------------------------------------|---------------------------------------------------------------------------|-----------------------------------------------------------------|
| <b>Poor/Fair Health Status</b>                                                                                                                                                                                                                                                                                                                                                                                                                                                                                                                          |                                                                 |                                                                 |                                                                           |                                                                 |
| Annualized rate of<br>change, 1999 to 2018                                                                                                                                                                                                                                                                                                                                                                                                                                                                                                              |                                                                 |                                                                 |                                                                           |                                                                 |
| Prevalence                                                                                                                                                                                                                                                                                                                                                                                                                                                                                                                                              | -0.01 (-0.08, +0.05), 0.74                                      | -0.09 (-0.22, +0.03), 0.14                                      | -0.02 (-0.10, +0.05), 0.53                                                | 0.00 (-0.05, +0.05), 0.99                                       |
| Difference with White                                                                                                                                                                                                                                                                                                                                                                                                                                                                                                                                   | -0.01 (-0.10, +0.08), 0.83                                      | -0.08 (-0.18, +0.01), 0.08                                      | -0.03 (-0.08, +0.02), 0.29                                                | –                                                               |
| <b>Functional Limitation</b>                                                                                                                                                                                                                                                                                                                                                                                                                                                                                                                            |                                                                 |                                                                 |                                                                           |                                                                 |
| Annualized rate of<br>change, 1999 to 2018                                                                                                                                                                                                                                                                                                                                                                                                                                                                                                              |                                                                 |                                                                 |                                                                           |                                                                 |
| Prevalence                                                                                                                                                                                                                                                                                                                                                                                                                                                                                                                                              | +0.18 (-0.05, +0.42), 0.13                                      | +0.42 (+0.26, +0.59), <0.001                                    | +0.46 (+0.21, +0.71), <0.001                                              | +0.32 (+0.18, +0.46), <0.001                                    |
| Difference with White                                                                                                                                                                                                                                                                                                                                                                                                                                                                                                                                   | -0.15 (-0.32, +0.02), 0.08                                      | +0.12 (+0.03, +0.20), <0.001                                    | +0.14 (0.00, +0.28), 0.05                                                 | –                                                               |
| <b>Severe Psychological<br/>Distress</b>                                                                                                                                                                                                                                                                                                                                                                                                                                                                                                                |                                                                 |                                                                 |                                                                           |                                                                 |
| Annualized rate of<br>change, 1999 to 2018                                                                                                                                                                                                                                                                                                                                                                                                                                                                                                              |                                                                 |                                                                 |                                                                           |                                                                 |
| Prevalence                                                                                                                                                                                                                                                                                                                                                                                                                                                                                                                                              | 0.00 (-0.04, +0.05), 0.89                                       | +0.03 (+0.01, +0.06), 0.02                                      | +0.04 (0.00, +0.07), 0.06                                                 | +0.05 (+0.04, +0.07), <0.001                                    |
| Difference with White                                                                                                                                                                                                                                                                                                                                                                                                                                                                                                                                   | -0.05 (-0.10, +0.01), 0.08                                      | -0.02 (-0.05, 0.00), 0.18                                       | +0.02 (-0.07, +0.03), 0.49                                                | –                                                               |
| Abbreviations: CI, confidence interval                                                                                                                                                                                                                                                                                                                                                                                                                                                                                                                  |                                                                 |                                                                 |                                                                           |                                                                 |
| <sup>a</sup> For annualized rate of change in the prevalence and change in difference with White: a positive sign (+) means the prevalence of such a measure (or its difference with White people) increased, and a negative sign (-) means it decreased. For all measures, a decrease in prevalence (negative sign) is a socially positive result (i.e., reduced percentage of people with poor or fair health status, reduced percentage of people with severe psychological distress, and reduced percentage of people with functional limitations). |                                                                 |                                                                 |                                                                           |                                                                 |
| <sup>b</sup> Percentage point estimates are adjusted for age, sex, and US region.                                                                                                                                                                                                                                                                                                                                                                                                                                                                       |                                                                 |                                                                 |                                                                           |                                                                 |



**eTable 8. Adjusted Annual Prevalence of Lack of Health Insurance by Race and Ethnicity, 1999-2018.**

**A. Overall**

| <b>Year</b> | <b>Asian,<br/>% (95% CI)</b> | <b>Black,<br/>% (95% CI)</b> | <b>Latino/Hispanic,<br/>% (95% CI)</b> | <b>White,<br/>% (95% CI)</b> |
|-------------|------------------------------|------------------------------|----------------------------------------|------------------------------|
| 1999        | 14.4 (11.5, 17.7)            | 13.8 (12.5, 15.3)            | 26.1 (24.4, 28.0)                      | 8.6 (8.2, 9.0)               |
| 2000        | 15.2 (12.6, 18.1)            | 15.3 (14.1, 16.5)            | 30.1 (28.4, 32.0)                      | 8.8 (8.4, 9.3)               |
| 2001        | 14.1 (11.5, 17.1)            | 13.5 (12.3, 14.7)            | 28.6 (26.9, 30.3)                      | 8.4 (8.0, 8.8)               |
| 2002        | 15.7 (13.1, 18.8)            | 14.5 (13.4, 15.6)            | 29.3 (27.5, 31.0)                      | 9.0 (8.6, 9.5)               |
| 2003        | 15.5 (12.9, 18.4)            | 14.5 (13.4, 15.8)            | 30.6 (28.9, 32.4)                      | 9.6 (9.1, 10.1)              |
| 2004        | 14.8 (12.1, 18.1)            | 14.8 (13.6, 16.1)            | 31.2 (29.6, 32.8)                      | 9.5 (9.0, 9.9)               |
| 2005        | 14.9 (12.4, 17.7)            | 15.9 (14.5, 17.4)            | 30.1 (28.5, 31.7)                      | 9.6 (9.1, 10.1)              |
| 2006        | 13.1 (11.0, 15.6)            | 14.9 (13.8, 16.2)            | 32.0 (30.1, 34.1)                      | 10.1 (9.5, 10.7)             |
| 2007        | 13.7 (11.4, 16.4)            | 14.4 (13.1, 15.8)            | 28.5 (26.5, 30.7)                      | 10.1 (9.5, 10.7)             |
| 2008        | 11.0 (9.0, 13.4)             | 14.5 (13.1, 15.8)            | 30.2 (27.9, 32.5)                      | 9.8 (9.2, 10.5)              |
| 2009        | 14.0 (11.9, 16.6)            | 16.3 (14.8, 17.9)            | 31.7 (29.8, 33.7)                      | 10.7 (10.1, 11.4)            |
| 2010        | 14.4 (12.3, 16.6)            | 17.2 (15.7, 18.8)            | 30.0 (28.4, 31.7)                      | 11.0 (10.5, 11.6)            |
| 2011        | 14.4 (12.5, 16.6)            | 16.5 (15.2, 17.9)            | 30.1 (28.5, 31.7)                      | 10.3 (9.8, 10.9)             |
| 2012        | 14.9 (12.7, 17.2)            | 15.4 (14.1, 16.8)            | 30.4 (28.7, 32.2)                      | 9.9 (9.3, 10.4)              |
| 2013        | 11.5 (10.0, 13.2)            | 16.4 (15.1, 17.8)            | 29.7 (28.1, 31.4)                      | 9.7 (9.1, 10.3)              |
| 2014        | 10.2 (8.5, 12.1)             | 11.4 (10.3, 12.6)            | 24.7 (23.1, 26.4)                      | 7.4 (6.9, 7.9)               |
| 2015        | 6.1 (4.9, 7.5)               | 8.7 (7.8, 9.7)               | 18.9 (17.6, 20.4)                      | 5.7 (5.3, 6.1)               |
| 2016        | 5.9 (4.5, 7.7)               | 8.3 (7.2, 9.5)               | 16.0 (14.4, 17.9)                      | 5.3 (4.9, 5.7)               |
| 2017        | 5.3 (4.1, 7.0)               | 8.6 (7.3, 10.1)              | 18.4 (16.7, 20.4)                      | 5.3 (4.9, 5.8)               |
| 2018        | 5.9 (4.5, 7.5)               | 8.8 (7.7, 10.1)              | 18.0 (16.0, 20.1)                      | 5.8 (5.4, 6.3)               |

Abbreviation: CI, confidence interval.

**B. By Income-Level**

| Year | Asian,<br>% (95% CI) |                    | Black,<br>% (95% CI) |                    | Latino/Hispanic,<br>% (95% CI) |                    | White,<br>% (95% CI) |                    |
|------|----------------------|--------------------|----------------------|--------------------|--------------------------------|--------------------|----------------------|--------------------|
|      | Low income           | Middle/high income | Low income           | Middle/high income | Low income                     | Middle/high income | Low income           | Middle/high income |
| 1999 | 32.9 (26.1, 40.6)    | 8.0 (5.6, 11.2)    | 22.5 (20.3, 25.0)    | 7.4 (6.1, 9.0)     | 40.4 (37.7, 43.2)              | 13.9 (12.3, 15.7)  | 21.0 (19.7, 22.4)    | 5.5 (5.1, 5.9)     |
| 2000 | 31.1 (24.7, 38.1)    | 9.6 (7.2, 12.6)    | 24.0 (21.8, 26.1)    | 9.2 (8.0, 10.6)    | 45.1 (42.5, 47.7)              | 16.4 (14.5, 18.4)  | 20.0 (18.7, 21.5)    | 5.8 (5.4, 6.2)     |
| 2001 | 32.8 (25.1, 41.4)    | 8.0 (5.8, 10.9)    | 20.2 (18.2, 22.4)    | 8.6 (7.4, 9.9)     | 41.7 (39.3, 44.2)              | 15.8 (14.3, 17.5)  | 18.5 (17.3, 19.8)    | 5.7 (5.4, 6.1)     |
| 2002 | 27.4 (20.9, 34.8)    | 10.9 (8.3, 14.2)   | 23.1 (21.1, 25.3)    | 8.4 (7.3, 9.7)     | 42.5 (39.8, 45.3)              | 18.3 (16.5, 20.2)  | 17.7 (16.4, 19.0)    | 6.6 (6.2, 7.0)     |
| 2003 | 36.0 (28.8, 43.9)    | 7.9 (5.9, 10.4)    | 23.1 (20.9, 25.5)    | 8.9 (7.7, 10.4)    | 43.6 (41.1, 46.2)              | 17.5 (15.7, 19.3)  | 20.4 (18.9, 22.0)    | 6.4 (5.9, 6.9)     |
| 2004 | 29.2 (22.8, 36.6)    | 9.1 (6.9, 11.9)    | 20.8 (18.8, 22.9)    | 10.5 (9.1, 12.2)   | 41.6 (39.3, 44.0)              | 20.0 (18.0, 22.0)  | 20.8 (19.4, 22.3)    | 6.2 (5.7, 6.6)     |
| 2005 | 26.5 (20.6, 33.4)    | 10.9 (8.4, 13.9)   | 24.1 (21.7, 26.5)    | 9.8 (8.4, 11.3)    | 41.9 (39.6, 44.2)              | 18.6 (16.7, 20.7)  | 20.7 (19.4, 22.2)    | 6.4 (6.0, 6.8)     |
| 2006 | 22.8 (17.8, 28.7)    | 9.5 (7.2, 12.3)    | 21.9 (19.9, 23.9)    | 9.5 (8.2, 11.0)    | 45.0 (42.3, 47.6)              | 19.5 (17.2, 21.8)  | 21.3 (19.8, 23.0)    | 6.6 (6.1, 7.1)     |
| 2007 | 25.1 (19.7, 31.5)    | 9.3 (7.1, 12.0)    | 20.9 (18.9, 23.1)    | 9.6 (8.0, 11.5)    | 41.0 (38.0, 44.0)              | 17.4 (15.4, 19.6)  | 21.3 (19.6, 23.2)    | 6.8 (6.3, 7.5)     |
| 2008 | 19.7 (14.5, 26.5)    | 7.7 (5.9, 10.1)    | 21.3 (19.0, 23.8)    | 9.9 (8.5, 11.4)    | 42.6 (39.3, 46.0)              | 19.7 (17.6, 22.1)  | 20.4 (18.6, 22.4)    | 6.7 (6.1, 7.4)     |
| 2009 | 29.8 (24.1, 36.2)    | 8.6 (6.8, 10.9)    | 23.4 (20.8, 26.1)    | 10.9 (9.5, 12.5)   | 43.9 (41.2, 46.6)              | 19.7 (17.6, 22.0)  | 21.1 (19.5, 22.7)    | 7.6 (7.0, 8.3)     |
| 2010 | 26.3 (21.5, 31.8)    | 9.6 (7.8, 11.8)    | 25.8 (23.3, 28.4)    | 9.9 (8.6, 11.5)    | 44.6 (42.1, 47.1)              | 15.4 (13.8, 17.2)  | 23.5 (22.0, 25.0)    | 7.0 (6.5, 7.6)     |
| 2011 | 25.3 (21.5, 29.6)    | 9.6 (7.7, 11.9)    | 23.8 (22.0, 25.7)    | 10.4 (8.9, 12.2)   | 43.1 (40.9, 45.4)              | 16.2 (14.4, 18.1)  | 22.2 (20.6, 23.9)    | 6.4 (6.0, 6.9)     |
| 2012 | 29.7 (24.9, 35.2)    | 8.6 (6.8, 11.0)    | 22.0 (19.8, 24.3)    | 9.8 (8.4, 11.5)    | 40.5 (38.0, 43.1)              | 18.7 (16.8, 20.7)  | 21.6 (20.2, 23.1)    | 5.9 (5.4, 6.3)     |
| 2013 | 23.5 (19.8, 27.6)    | 6.6 (5.3, 8.2)     | 24.9 (22.7, 27.2)    | 9.2 (7.8, 10.8)    | 43.9 (41.6, 46.2)              | 16.1 (14.4, 17.9)  | 21.2 (19.5, 23.0)    | 6.0 (5.5, 6.5)     |
| 2014 | 19.9 (15.7, 24.8)    | 6.4 (4.9, 8.4)     | 16.4 (14.5, 18.5)    | 6.5 (5.5, 7.8)     | 34.3 (31.9, 36.8)              | 14.5 (12.7, 16.5)  | 15.8 (14.4, 17.2)    | 4.7 (4.3, 5.2)     |
| 2015 | 11.7 (8.6, 15.6)     | 4.1 (3.1, 5.5)     | 12.2 (10.6, 13.9)    | 6.0 (4.9, 7.3)     | 27.4 (25.4, 29.4)              | 11.3 (9.8, 12.9)   | 11.6 (10.5, 12.8)    | 3.9 (3.5, 4.3)     |
| 2016 | 10.7 (7.6, 14.8)     | 4.2 (2.8, 6.3)     | 12.7 (10.9, 14.7)    | 5.0 (3.8, 6.3)     | 24.1 (21.2, 27.3)              | 9.0 (7.7, 10.6)    | 10.8 (9.7, 12.0)     | 3.6 (3.3, 4.0)     |
| 2017 | 9.1 (6.3, 12.9)      | 4.0 (2.8, 5.8)     | 11.8 (9.7, 14.3)     | 6.2 (4.9, 7.8)     | 28.8 (25.9, 31.9)              | 10.4 (8.8, 12.3)   | 10.4 (9.2, 11.6)     | 3.9 (3.5, 4.3)     |
| 2018 | 10.0 (7.0, 14.0)     | 4.4 (3.1, 6.2)     | 12.6 (10.7, 14.7)    | 6.0 (4.8, 7.5)     | 27.3 (24.0, 30.8)              | 10.5 (8.9, 12.3)   | 11.9 (10.6, 13.4)    | 4.2 (3.8, 4.7)     |

Abbreviation: CI, confidence interval.

**eTable 9. Adjusted Annualized Rate of Change in the Prevalence of Measures of Health Status and Health Care Access, Utilization, and Affordability by Race, Ethnicity, and Income.**

| <b>Outcome</b>                               | <b>Asian<br/>Percentage points <sup>b,c</sup><br/>(95% CI), p value</b> | <b>Black<br/>Percentage points <sup>b,c</sup> (95%<br/>CI), p value</b> | <b>Latino/Hispanic<br/>Percentage points <sup>b,c</sup> (95%<br/>CI), p value</b> | <b>White<br/>Percentage points <sup>b,c</sup><br/>(95% CI), p value</b> |
|----------------------------------------------|-------------------------------------------------------------------------|-------------------------------------------------------------------------|-----------------------------------------------------------------------------------|-------------------------------------------------------------------------|
| <b>Poor/Fair Health Status</b>               |                                                                         |                                                                         |                                                                                   |                                                                         |
| Overall                                      | -0.01 (-0.08, +0.07), 0.85                                              | -0.07 (-0.14, +0.00), 0.05                                              | -0.02 (-0.09, +0.05), 0.55                                                        | 0.00 (-0.03, +0.04), 0.87                                               |
| Low-Income Group                             | +0.14 (-0.02, +0.30), 0.08                                              | -0.06 (-0.17, +0.05), 0.29                                              | +0.04 (-0.06, +0.15), 0.41                                                        | +0.17 (+0.11, +0.24), <0.001                                            |
| Middle/High-Income Group                     | -0.04 (-0.11, +0.04), 0.32                                              | -0.09 (-0.17, -0.01), 0.03                                              | -0.06 (-0.11, -0.00), 0.04                                                        | -0.03 (-0.06, -0.01), 0.01                                              |
| <b>Functional Limitation</b>                 |                                                                         |                                                                         |                                                                                   |                                                                         |
| Overall                                      | +0.12 (-0.06, +0.30), 0.17                                              | +0.43 (+0.29, +0.58), <0.001                                            | +0.44 (+0.27, +0.62), <0.001                                                      | +0.31 (+0.18, +0.43), <0.001                                            |
| Low-Income Group                             | +0.33 (+0.05, +0.61), 0.02                                              | +0.53 (+0.39, +0.67), <0.001                                            | +0.52 (+0.34, +0.70), <0.001                                                      | +0.64 (+0.52, +0.76), <0.001                                            |
| Middle/High-Income Group                     | +0.07 (-0.12, +0.27), 0.42                                              | +0.35 (+0.17, +0.52), 0.001                                             | +0.34 (+0.15, +0.54), 0.002                                                       | +0.21 (+0.09, +0.34), 0.002                                             |
| <b>Severe Psychological Distress</b>         |                                                                         |                                                                         |                                                                                   |                                                                         |
| Overall                                      | +0.02 (-0.04, +0.08), 0.43                                              | +0.04 (+0.01, +0.07), 0.02                                              | +0.03 (-0.00, +0.07), 0.07                                                        | +0.05 (+0.03, +0.08), <0.001                                            |
| Low-Income Group                             | +0.07 (-0.01, +0.14), 0.08                                              | +0.04 (-0.01, +0.10), 0.14                                              | +0.05 (-0.01, +0.12), 0.10                                                        | +0.15 (+0.09, +0.21), <0.001                                            |
| Middle/High-Income Group                     | +0.03 (-0.04, +0.09), 0.38                                              | +0.03 (+0.00, +0.06), 0.03                                              | +0.01 (-0.03, +0.05), 0.58                                                        | +0.02 (+0.00, +0.04), 0.03                                              |
| <b>Lack of Health Insurance <sup>a</sup></b> |                                                                         |                                                                         |                                                                                   |                                                                         |
| <b>Overall</b>                               |                                                                         |                                                                         |                                                                                   |                                                                         |
| 1999-2009                                    | +0.04 (-0.35, +0.42), 0.84                                              | +0.33 (+0.03, +0.63), 0.03                                              | +0.52 (+0.09, +0.96), 0.02                                                        | +0.29 (+0.17, +0.42), <0.001                                            |
| 2010-2015                                    | -1.19 (-1.67, -0.72), <0.001                                            | -1.09 (-1.54, -0.63), <0.001                                            | -1.93 (-2.60, -1.26), <0.001                                                      | -0.80 (-1.02, -0.59), <0.001                                            |

|                                             |                                                                 |                                                                 |                                                                           |                                                                 |
|---------------------------------------------|-----------------------------------------------------------------|-----------------------------------------------------------------|---------------------------------------------------------------------------|-----------------------------------------------------------------|
| 2016-2018                                   | -0.85 (-1.84, 0.15), 0.04                                       | -0.70 (-1.89, +0.46), 0.22                                      | -1.62 (-3.35, +0.24), 0.08                                                | -0.36 (-0.87, +0.14), 0.15                                      |
| <b>Low-Income Group</b>                     |                                                                 |                                                                 |                                                                           |                                                                 |
| <b>Outcome</b>                              | <b>Asian Percentage points <sup>b,c</sup> (95% CI), p value</b> | <b>Black Percentage points <sup>b,c</sup> (95% CI), p value</b> | <b>Latino/Hispanic Percentage points <sup>b,c</sup> (95% CI), p value</b> | <b>White Percentage points <sup>b,c</sup> (95% CI), p value</b> |
| 1999-2009                                   | -0.31 (-1.25, +0.64), 0.50                                      | +0.30 (-0.21, +0.81), 0.23                                      | +0.47 (-0.16, +1.10), 0.13                                                | +0.47 (+0.08, +0.85), 0.02                                      |
| 2010-2015                                   | -2.05 (-3.21, -0.88), 0.002                                     | -1.57 (-2.33, -0.80), 0.001                                     | -2.41 (-3.39, -1.42), <0.001                                              | -1.64 (-2.25, -1.03), <0.001                                    |
| 2016-2018                                   | -2.45 (-4.84, -0.06), 0.05                                      | -1.13 (-3.02, +0.76), 0.22                                      | -1.84 (-4.78, +1.11), 0.21                                                | -1.04 (-2.54, +0.46), 0.16                                      |
| <b>Middle/High-Income Group</b>             |                                                                 |                                                                 |                                                                           |                                                                 |
| 1999-2009                                   | +0.12 (-0.10, +0.34), 0.25                                      | +0.30 (+0.16, +0.44), <0.001                                    | +0.42 (+0.11, +0.72), 0.01                                                | +0.19 (+0.13, +0.25), <0.001                                    |
| 2010-2015                                   | -0.83 (-1.10, -0.56), <0.001                                    | -0.79 (-1.02, -0.57), <0.001                                    | -1.33 (-1.83, -0.82), <0.001                                              | -0.56 (-0.66, -0.45), <0.001                                    |
| 2016-2018                                   | -0.22 (-0.81, +0.40), 0.45                                      | -0.15 (-0.73, +0.42), 0.58                                      | -0.73 (-1.96, +0.51), 0.23                                                | -0.04 (-0.29, +0.21), 0.77                                      |
| <b>No Usual Source of Care <sup>a</sup></b> |                                                                 |                                                                 |                                                                           |                                                                 |
| <b>Overall</b>                              |                                                                 |                                                                 |                                                                           |                                                                 |
| 1999-2009                                   | -0.01 (-0.27, +0.25), 0.94                                      | +0.37 (+0.17, +0.58), 0.001                                     | +0.32 (0.06, 0.57), 0.02                                                  | +0.16 (+0.02, +2.90), 0.02                                      |
| 2010-2015                                   | -0.05 (-0.44, +0.34), 0.79                                      | -0.31 (-0.66, +0.04), 0.08                                      | -1.09 (-1.49, -0.69), <0.001                                              | -0.10 (-0.34, +0.14), 0.39                                      |
| 2016-2018                                   | -0.78 (-1.68, +0.13), 0.09                                      | -0.11 (-1.15, +0.93), 0.83                                      | -0.35 (-1.43, +0.74), 0.51                                                | -0.12 (-0.74, +0.49), 0.68                                      |
| <b>Low-Income Group</b>                     |                                                                 |                                                                 |                                                                           |                                                                 |
| 1999-2009                                   | -0.19 (-0.94, +0.57), 0.61                                      | +0.63 (+0.33, +0.93), <0.001                                    | +0.34 (-0.02, +0.69), 0.06                                                | +0.39 (+0.14, +0.64), 0.005                                     |
| 2010-2015                                   | -0.44 (-1.47, +0.59), 0.38                                      | -0.65 (-1.15, -0.16), 0.01                                      | -1.52 (-2.86, -0.97), <0.001                                              | -0.29 (-0.74, +0.15), 0.18                                      |
| 2016-2018                                   | -1.19 (-3.59, +1.21), 0.31                                      | -0.10 (-1.35, +1.45), 0.94                                      | -0.47 (-2.07, +1.14), 0.55                                                | -0.38 (-1.52, +0.77), 0.49                                      |
| <b>Middle/High-Income Group</b>             |                                                                 |                                                                 |                                                                           |                                                                 |
| 1999-2009                                   | -0.02 (-0.29, +0.25), 0.90                                      | +0.16 (0.00, +0.33), 0.06                                       | +0.21 (+0.05, +0.37), 0.02                                                | +0.08 (-0.03, +0.19), 0.16                                      |
| 2010-2015                                   | +0.14 (-0.27, +0.56), 0.48                                      | -0.13 (-0.43, +0.16), 0.35                                      | -0.62 (-0.90, -0.35), 0.001                                               | -0.06 (-0.26, +0.13), 0.53                                      |

| <b>Outcome</b>                                                                                         | <b>Asian<br/>Percentage points <sup>b,c</sup><br/>(95% CI), p value</b> | <b>Black<br/>Percentage points <sup>b,c</sup> (95%<br/>CI), p value</b> | <b>Latino/Hispanic<br/>Percentage points <sup>b,c</sup> (95%<br/>CI), p value</b> | <b>White<br/>Percentage points <sup>b,c</sup><br/>(95% CI), p value</b> |
|--------------------------------------------------------------------------------------------------------|-------------------------------------------------------------------------|-------------------------------------------------------------------------|-----------------------------------------------------------------------------------|-------------------------------------------------------------------------|
| 2016-2018                                                                                              | -0.50 (-1.52, +0.52), 0.32                                              | +0.07 (-0.81, +0.94), 0.87                                              | +0.17 (-0.55, +0.89), 0.62                                                        | +0.10 (-0.44, +0.62), 0.72                                              |
| <b>Not Seen or Talked<br/>to a Health<br/>Professional in the<br/>Past 12 Months <sup>a</sup></b>      |                                                                         |                                                                         |                                                                                   |                                                                         |
| <b>Overall</b>                                                                                         |                                                                         |                                                                         |                                                                                   |                                                                         |
| 1999-2009                                                                                              | +0.01 (-0.31, +0.33), 0.97                                              | +0.09 (-0.06, +0.24), 0.22                                              | +0.04 (-0.20, +0.28), 0.72                                                        | -0.04 (-0.12, +0.05), 0.37                                              |
| 2010-2015                                                                                              | -0.31 (-0.79, +0.17), 0.19                                              | -0.14 (-0.40, +0.11), 0.25                                              | -0.36 (-0.76, +0.04), 0.08                                                        | -0.05 (-0.21, +0.10), 0.48                                              |
| 2016-2018                                                                                              | -0.48 (-1.75, +0.79), 0.44                                              | -0.42 (-1.14, +0.29), 0.23                                              | -1.19 (-2.32, -0.06), 0.04                                                        | -0.44 (-0.82, -0.06), 0.03                                              |
| <b>Low-Income<br/>Group</b>                                                                            |                                                                         |                                                                         |                                                                                   |                                                                         |
| 1999-2009                                                                                              | +0.22 (-0.28, +0.72), 0.37                                              | +0.18 (-0.05, +0.40), 0.11                                              | +0.13 (-0.13, +0.39), 0.31                                                        | +0.11 (-0.05, +0.28), 0.17                                              |
| 2010-2015                                                                                              | -0.99 (-1.72, -0.26), 0.01                                              | -0.27 (-0.65, +0.12), 0.16                                              | -0.60 (-1.04, -0.16), 0.01                                                        | -0.11 (-0.40, +0.17), 0.41                                              |
| 2016-2018                                                                                              | -0.59 (-2.40, +1.22), 0.50                                              | -0.53 (-1.59, +0.52), 0.30                                              | -1.33 (-2.56, -0.10), 0.04                                                        | -0.56 (-1.32, +0.21), 0.14                                              |
| <b>Middle/High-<br/>Income Group</b>                                                                   |                                                                         |                                                                         |                                                                                   |                                                                         |
| 1999-2009                                                                                              | -0.06 (-0.43, +0.30), 0.72                                              | +0.01 (-0.18, +0.20), 0.93                                              | -0.08 (-0.32, +0.16), 0.48                                                        | -0.09 (-0.17, -0.01), 0.03                                              |
| 2010-2015                                                                                              | -0.06 (-0.60, +0.48), 0.82                                              | -0.08 (-0.40, +0.24), 0.60                                              | -0.12 (-0.55, +0.31), 0.56                                                        | -0.03 (-0.17, +0.11), 0.67                                              |
| 2016-2018                                                                                              | -0.37 (-1.85, +1.11), 0.60                                              | -0.28 (-1.20, +0.64), 0.53                                              | -0.66 (-0.18, +0.50), 0.24                                                        | -0.35 (-0.69, -0.02), 0.04                                              |
| <b>Foregone or<br/>Delayed Medical<br/>Care Due to Cost in<br/>the Past 12 Months<br/><sup>a</sup></b> |                                                                         |                                                                         |                                                                                   |                                                                         |
| <b>Overall</b>                                                                                         |                                                                         |                                                                         |                                                                                   |                                                                         |
| 1999-2009                                                                                              | +0.35 (+0.15, +0.55),<br>0.002                                          | +0.93 (+0.71, +1.16), <0.001                                            | +1.12 (+0.95, +1.29), <0.001                                                      | +0.67 (+0.57, +0.77),<br><0.001                                         |
| 2010-2015                                                                                              | -0.28 (-0.59, +0.03), 0.07                                              | -0.83 (-1.24, -0.42), 0.001                                             | -1.22 (-1.52, -0.92), <0.001                                                      | -0.78 (-0.96, -0.59), <0.001                                            |
| 2016-2018                                                                                              | -0.45 (-1.14, +0.23), 0.18                                              | -0.53 (-1.67, +0.61), 0.34                                              | -0.49 (-1.22, +0.25), 0.18                                                        | +0.26 (-0.22, +0.74), 0.27                                              |

| <b>Outcome</b>                                                                                                                                                                                                                                                                                                                                                                                                                                                                                                                                                                                                                                                                                                                                    | <b>Asian<br/>Percentage points <sup>b,c</sup><br/>(95% CI), p value</b> | <b>Black<br/>Percentage points <sup>b,c</sup> (95%<br/>CI), p value</b> | <b>Latino/Hispanic<br/>Percentage points <sup>b,c</sup> (95%<br/>CI), p value</b> | <b>White<br/>Percentage points <sup>b,c</sup><br/>(95% CI), p value</b> |
|---------------------------------------------------------------------------------------------------------------------------------------------------------------------------------------------------------------------------------------------------------------------------------------------------------------------------------------------------------------------------------------------------------------------------------------------------------------------------------------------------------------------------------------------------------------------------------------------------------------------------------------------------------------------------------------------------------------------------------------------------|-------------------------------------------------------------------------|-------------------------------------------------------------------------|-----------------------------------------------------------------------------------|-------------------------------------------------------------------------|
| <b>Low-Income<br/>Group</b>                                                                                                                                                                                                                                                                                                                                                                                                                                                                                                                                                                                                                                                                                                                       |                                                                         |                                                                         |                                                                                   |                                                                         |
| 1999-2009                                                                                                                                                                                                                                                                                                                                                                                                                                                                                                                                                                                                                                                                                                                                         | +0.37 (-0.06, +0.80), 0.09                                              | +1.05 (+0.71, +1.38), <0.001                                            | +1.35 (+1.14, +1.56), <0.001                                                      | +1.00 (+0.78, +1.23), <0.001                                            |
| 2010-2015                                                                                                                                                                                                                                                                                                                                                                                                                                                                                                                                                                                                                                                                                                                                         | -0.00 (-0.64, +0.63), 0.99                                              | -1.17 (-1.73, -0.61), <0.001                                            | -1.34 (-1.70, -0.99), <0.001                                                      | -1.24 (-1.66, -0.82), <0.001                                            |
| 2016-2018                                                                                                                                                                                                                                                                                                                                                                                                                                                                                                                                                                                                                                                                                                                                         | -2.45 (-3.84, -1.05), 0.002                                             | -1.07 (-2.58, +0.43), 0.15                                              | -0.92 (-1.85, +0.02), 0.06                                                        | -0.11 (-1.18, +0.96), 0.83                                              |
| <b>Middle/High-<br/>Income Group</b>                                                                                                                                                                                                                                                                                                                                                                                                                                                                                                                                                                                                                                                                                                              |                                                                         |                                                                         |                                                                                   |                                                                         |
| 1999-2009                                                                                                                                                                                                                                                                                                                                                                                                                                                                                                                                                                                                                                                                                                                                         | +0.32 (+0.16, +0.47), <0.001                                            | +0.80 (+0.59, +0.10), <0.001                                            | +0.84 (+0.69, +1.00), <0.001                                                      | +0.52 (+0.42, +0.61), <0.001                                            |
| 2010-2015                                                                                                                                                                                                                                                                                                                                                                                                                                                                                                                                                                                                                                                                                                                                         | -0.35 (-0.61, -0.09), 0.01                                              | -0.60 (-1.0, -0.2), 0.006                                               | -1.05 (-1.31, -0.78), <0.001                                                      | -0.62 (-0.78, -0.45), <0.001                                            |
| 2016-2018                                                                                                                                                                                                                                                                                                                                                                                                                                                                                                                                                                                                                                                                                                                                         | +0.36 (-0.23, +0.96), 0.21                                              | +0.22 (-0.92, +1.37), 0.68                                              | +0.27 (-0.40, +0.94), 0.40                                                        | +0.58 (+0.13, +1.04), 0.02                                              |
| Abbreviations: CI, confidence interval                                                                                                                                                                                                                                                                                                                                                                                                                                                                                                                                                                                                                                                                                                            |                                                                         |                                                                         |                                                                                   |                                                                         |
| <sup>a</sup> For these measures, rather than assuming a monotonic relationship between time and measure rates, time was modelled as a linear spline with knots at 2010 and 2016 to reflect the observed inflection points of unmet medical needs due to cost and health insurance coverage                                                                                                                                                                                                                                                                                                                                                                                                                                                        |                                                                         |                                                                         |                                                                                   |                                                                         |
| <sup>b</sup> For adjusted annualized rate of change in the prevalence: a positive sign (+) means the prevalence of such a measure increased, and a negative sign (-) means it decreased. For all measures, a decrease in prevalence (negative sign) is a socially positive result (i.e., increased percentage of people with insurance coverage, increased percentage of people with a usual source of care, increased percentage of people with recent health care utilization, reduced percentage of people with unmet medical needs due to cost, reduced percentage of people with poor or fair health status, reduced percentage of people with severe psychological distress, and reduced percentage of people with functional limitations). |                                                                         |                                                                         |                                                                                   |                                                                         |
| <sup>c</sup> Percentage point estimates are adjusted for age, sex, and US region.                                                                                                                                                                                                                                                                                                                                                                                                                                                                                                                                                                                                                                                                 |                                                                         |                                                                         |                                                                                   |                                                                         |

**eTable 10. Adjusted Annual Prevalence of Lack of a Usual Source of Care by Race and Ethnicity, 1999-2018.**

**A. Overall**

| <b>Year</b> | <b>Asian,<br/>% (95% CI)</b> | <b>Black,<br/>% (95% CI)</b> | <b>Latino/Hispanic,<br/>% (95% CI)</b> | <b>White,<br/>% (95% CI)</b> |
|-------------|------------------------------|------------------------------|----------------------------------------|------------------------------|
| 1999        | 17.0 (14.2, 20.2)            | 13.0 (11.7, 14.6)            | 20.3 (18.8, 21.9)                      | 10.6 (10.1, 11.0)            |
| 2000        | 13.7 (11.7, 16.1)            | 11.9 (10.8, 12.9)            | 21.8 (20.1, 23.5)                      | 9.4 (8.9, 9.9)               |
| 2001        | 12.3 (10.2, 14.7)            | 9.8 (8.8, 10.9)              | 20.7 (19.4, 22.1)                      | 8.7 (8.3, 9.2)               |
| 2002        | 15.6 (12.8, 18.8)            | 11.6 (10.4, 12.8)            | 21.1 (19.7, 22.6)                      | 8.7 (8.3, 9.2)               |
| 2003        | 13.1 (10.8, 15.9)            | 11.3 (10.2, 12.4)            | 20.0 (18.7, 21.5)                      | 8.8 (8.4, 9.3)               |
| 2004        | 13.3 (10.9, 16.2)            | 12.0 (10.9, 13.2)            | 22.8 (21.5, 24.2)                      | 10.0 (9.4, 10.5)             |
| 2005        | 12.3 (10.0, 15.1)            | 12.5 (11.4, 13.8)            | 21.7 (20.4, 23.1)                      | 9.7 (9.2, 10.3)              |
| 2006        | 12.1 (10.3, 14.3)            | 12.4 (11.2, 13.7)            | 24.5 (22.8, 26.3)                      | 10.2 (9.5, 11.0)             |
| 2007        | 11.8 (9.8, 14.1)             | 12.3 (11.0, 13.6)            | 21.2 (19.6, 22.9)                      | 10.2 (9.6, 10.9)             |
| 2008        | 12.1 (10.0, 14.6)            | 14.1 (12.7, 15.5)            | 21.7 (19.7, 23.8)                      | 10.1 (9.4, 10.9)             |
| 2009        | 15.2 (13.1, 17.6)            | 14.6 (13.3, 16.0)            | 21.8 (20.2, 23.5)                      | 11.4 (10.8, 12.1)            |
| 2010        | 14.8 (12.7, 17.2)            | 15.3 (14.0, 16.7)            | 22.5 (21.0, 24.0)                      | 11.3 (10.7, 11.9)            |
| 2011        | 14.6 (12.8, 16.5)            | 14.3 (13.0, 15.7)            | 21.6 (20.3, 23.0)                      | 10.1 (9.6, 10.6)             |
| 2012        | 14.8 (13.0, 16.7)            | 14.8 (13.5, 16.1)            | 23.0 (21.7, 24.4)                      | 11.1 (10.5, 11.7)            |
| 2013        | 13.3 (11.8, 15.0)            | 14.0 (12.9, 15.2)            | 20.4 (19.1, 21.8)                      | 10.7 (10.2, 11.3)            |
| 2014        | 12.6 (10.9, 14.5)            | 12.1 (11.0, 13.4)            | 17.3 (16.0, 18.7)                      | 9.7 (9.1, 10.3)              |
| 2015        | 12.7 (10.8, 14.8)            | 11.6 (10.4, 13.0)            | 16.1 (14.9, 17.3)                      | 10.1 (9.6, 10.7)             |
| 2016        | 12.4 (10.4, 14.8)            | 11.6 (10.1, 13.2)            | 15.1 (13.7, 16.7)                      | 9.5 (8.9, 10.0)              |
| 2017        | 11.2 (9.3, 13.5)             | 11.4 (10.0, 13.0)            | 15.9 (14.3, 17.6)                      | 9.5 (8.9, 10.1)              |
| 2018        | 11.1 (9.4, 13.1)             | 13.1 (11.5, 14.9)            | 16.6 (15.0, 18.4)                      | 10.0 (9.4, 10.7)             |

Abbreviation: CI, confidence interval.

**B. By Income-Level**

| Year | Asian,<br>% (95% CI) |                    | Black,<br>% (95% CI) |                    | Latino/Hispanic,<br>% (95% CI) |                    | White,<br>% (95% CI) |                    |
|------|----------------------|--------------------|----------------------|--------------------|--------------------------------|--------------------|----------------------|--------------------|
|      | Low income           | Middle/high income | Low income           | Middle/high income | Low income                     | Middle/high income | Low income           | Middle/high income |
| 1999 | 31.9 (25.0, 39.6)    | 12.1 (9.6, 15.1)   | 16.6 (14.6, 18.7)    | 10.2 (8.6, 12.0)   | 27.4 (25.1, 29.8)              | 14.0 (12.5, 15.7)  | 16.6 (15.5, 17.9)    | 8.9 (8.4, 9.4)     |
| 2000 | 22.4 (17.4, 28.3)    | 10.8 (8.6, 13.6)   | 16.4 (14.5, 18.5)    | 8.5 (7.3, 9.7)     | 30.0 (27.4, 32.8)              | 13.9 (12.4, 15.6)  | 14.8 (13.7, 16.0)    | 7.9 (7.3, 8.4)     |
| 2001 | 26.9 (21.0, 33.6)    | 7.9 (6.1, 10.2)    | 13.4 (11.7, 15.3)    | 7.1 (6.1, 8.2)     | 28.6 (26.6, 30.6)              | 12.9 (11.4, 14.5)  | 15.1 (14.0, 16.3)    | 7.0 (6.6, 7.5)     |
| 2002 | 23.1 (17.2, 30.1)    | 12.7 (9.9, 16.2)   | 15.9 (14.1, 17.8)    | 8.4 (7.1, 9.9)     | 29.2 (27.0, 31.4)              | 14.4 (12.9, 15.9)  | 14.0 (12.9, 15.2)    | 7.2 (6.8, 7.7)     |
| 2003 | 22.7 (16.1, 31.0)    | 9.7 (7.4, 12.6)    | 16.3 (14.3, 18.5)    | 7.8 (6.7, 8.9)     | 25.5 (23.4, 27.8)              | 14.3 (12.7, 16.0)  | 13.3 (12.3, 14.5)    | 7.5 (7.0, 8.0)     |
| 2004 | 21.3 (15.8, 28.0)    | 10.3 (8.0, 13.2)   | 16.1 (14.2, 18.2)    | 8.9 (7.6, 10.4)    | 30.4 (28.2, 32.6)              | 14.9 (13.3, 16.7)  | 16.6 (15.4, 17.9)    | 8.0 (7.5, 8.5)     |
| 2005 | 17.2 (12.7, 23.0)    | 10.7 (8.2, 13.8)   | 18.0 (15.7, 20.4)    | 8.3 (7.2, 9.6)     | 27.9 (25.9, 30.1)              | 15.6 (14.0, 17.3)  | 15.9 (14.6, 17.2)    | 7.9 (7.4, 8.4)     |
| 2006 | 17.3 (13.1, 22.3)    | 10.3 (8.2, 13.0)   | 17.9 (15.9, 20.1)    | 8.0 (6.8, 9.4)     | 32.8 (30.3, 35.3)              | 16.4 (14.3, 18.8)  | 16.7 (15.2, 18.5)    | 8.2 (7.5, 8.9)     |
| 2007 | 17.8 (13.9, 22.5)    | 9.6 (7.5, 12.2)    | 16.9 (14.8, 19.2)    | 8.8 (7.3, 10.5)    | 28.6 (26.0, 31.2)              | 14.5 (12.9, 16.3)  | 16.6 (14.9, 18.5)    | 8.4 (7.7, 9.1)     |
| 2008 | 25.6 (19.7, 32.4)    | 7.5 (5.8, 9.6)     | 20.0 (17.5, 22.7)    | 9.9 (8.4, 11.7)    | 29.3 (26.5, 32.2)              | 15.3 (13.2, 17.6)  | 17.6 (15.9, 19.5)    | 8.0 (7.3, 8.7)     |
| 2009 | 26.1 (20.6, 32.5)    | 11.6 (9.7, 13.9)   | 20.4 (18.1, 22.9)    | 10.1 (8.7, 11.6)   | 29.2 (27.0, 31.6)              | 14.5 (12.8, 16.5)  | 18.8 (17.3, 20.5)    | 9.2 (8.6, 9.9)     |
| 2010 | 24.2 (19.6, 29.6)    | 11.2 (9.0, 13.9)   | 21.4 (19.0, 24.1)    | 10.0 (8.6, 11.7)   | 29.4 (27.4, 31.5)              | 15.4 (13.7, 17.1)  | 18.8 (17.5, 20.1)    | 8.9 (8.3, 9.5)     |
| 2011 | 19.7 (16.3, 23.6)    | 12.4 (10.6, 14.6)  | 20.8 (18.7, 22.9)    | 8.8 (7.5, 10.3)    | 28.9 (27.0, 30.9)              | 13.8 (12.1, 15.6)  | 17.9 (16.6, 19.3)    | 7.5 (7.0, 8.1)     |
| 2012 | 26.7 (22.5, 31.5)    | 10.1 (8.4, 11.9)   | 20.1 (18.1, 22.3)    | 10.2 (8.7, 11.9)   | 28.4 (26.5, 30.4)              | 16.6 (14.8, 18.6)  | 18.3 (16.9, 19.6)    | 8.7 (8.1, 9.3)     |
| 2013 | 20.8 (17.4, 24.7)    | 10.3 (8.7, 12.1)   | 19.7 (18.1, 21.6)    | 9.1 (7.9, 10.6)    | 27.6 (25.7, 29.7)              | 13.3 (11.8, 14.9)  | 18.9 (17.5, 20.3)    | 8.1 (7.5, 8.7)     |
| 2014 | 19.4 (15.9, 23.6)    | 10.1 (8.3, 12.4)   | 16.6 (14.7, 18.7)    | 8.0 (6.6, 9.5)     | 22.5 (20.6, 24.6)              | 11.7 (10.3, 13.4)  | 15.4 (14.2, 16.7)    | 7.9 (7.2, 8.5)     |
| 2015 | 16.9 (13.2, 21.4)    | 11.3 (9.3, 13.6)   | 14.7 (12.9, 16.7)    | 9.2 (7.8, 10.9)    | 20.5 (18.8, 22.3)              | 11.9 (10.4, 13.6)  | 16.6 (15.2, 18.0)    | 8.1 (7.6, 8.7)     |
| 2016 | 16.7 (12.8, 21.5)    | 11.0 (8.6, 13.9)   | 16.8 (14.5, 19.5)    | 7.6 (6.1, 9.3)     | 18.9 (16.6, 21.5)              | 11.8 (10.2, 13.6)  | 15.1 (13.7, 16.5)    | 7.8 (7.2, 8.4)     |
| 2017 | 16.5 (12.6, 21.2)    | 9.5 (7.5, 12.1)    | 15.1 (12.8, 17.7)    | 8.5 (6.9, 10.5)    | 20.3 (17.8, 23.0)              | 12.4 (10.7, 14.4)  | 14.3 (13.0, 15.7)    | 8.2 (7.6, 8.8)     |
| 2018 | 16.2 (12.3, 20.9)    | 9.6 (7.7, 11.8)    | 17.9 (15.5, 20.7)    | 9.5 (7.8, 11.6)    | 21.7 (19.1, 24.6)              | 12.5 (10.8, 14.4)  | 16.7 (15.2, 18.2)    | 8.3 (7.7, 9.0)     |

Abbreviation: CI, confidence interval.



**eTable 11. Adjusted Annual Prevalence of No Health Care Utilization in the Past Year by Race and Ethnicity, 1999-2018.**

**A. Overall**

| <b>Year</b> | <b>Asian,<br/>% (95% CI)</b> | <b>Black,<br/>% (95% CI)</b> | <b>Latino/Hispanic,<br/>% (95% CI)</b> | <b>White,<br/>% (95% CI)</b> |
|-------------|------------------------------|------------------------------|----------------------------------------|------------------------------|
| 1999        | 20.6 (17.8, 23.7)            | 14.0 (12.7, 15.5)            | 21.9 (20.5, 23.4)                      | 13.2 (12.7, 13.7)            |
| 2000        | 17.2 (14.6, 20.2)            | 13.2 (12.0, 14.6)            | 23.5 (22.0, 25.1)                      | 12.4 (11.8, 12.9)            |
| 2001        | 19.3 (16.4, 22.6)            | 12.3 (11.1, 13.6)            | 22.7 (21.4, 24.1)                      | 12.8 (12.3, 13.4)            |
| 2002        | 19.1 (16.4, 22.1)            | 12.5 (11.2, 13.9)            | 22.6 (21.2, 24.1)                      | 12.2 (11.7, 12.7)            |
| 2003        | 20.3 (17.5, 23.6)            | 11.7 (10.6, 12.8)            | 20.5 (19.1, 22.0)                      | 11.5 (11.0, 12.1)            |
| 2004        | 17.8 (14.9, 21.0)            | 12.7 (11.6, 13.9)            | 24.8 (23.2, 26.6)                      | 12.2 (11.7, 12.7)            |
| 2005        | 18.2 (15.5, 21.1)            | 13.6 (12.4, 14.9)            | 22.7 (21.4, 24.0)                      | 11.9 (11.3, 12.5)            |
| 2006        | 18.6 (15.7, 21.9)            | 13.6 (12.2, 15.1)            | 24.8 (22.9, 26.7)                      | 13.3 (12.6, 14.1)            |
| 2007        | 21.2 (18.3, 24.6)            | 13.1 (11.8, 14.6)            | 22.7 (21.0, 24.5)                      | 12.3 (11.6, 13.1)            |
| 2008        | 15.6 (13.5, 18.0)            | 13.7 (12.4, 15.2)            | 22.4 (20.7, 24.1)                      | 12.2 (11.5, 12.9)            |
| 2009        | 20.8 (18.4, 23.4)            | 13.2 (12.0, 14.4)            | 21.7 (20.2, 23.1)                      | 11.8 (11.2, 12.5)            |
| 2010        | 19.5 (17.2, 22.1)            | 13.8 (12.5, 15.1)            | 21.7 (20.3, 23.1)                      | 12.6 (11.9, 13.2)            |
| 2011        | 18.8 (17.0, 20.8)            | 12.7 (11.5, 14.1)            | 23.0 (21.5, 24.5)                      | 12.2 (11.6, 12.8)            |
| 2012        | 18.0 (16.1, 20.1)            | 14.0 (12.8, 15.3)            | 23.6 (22.1, 25.1)                      | 12.5 (11.9, 13.1)            |
| 2013        | 18.3 (16.4, 20.3)            | 14.3 (13.2, 15.6)            | 23.0 (21.5, 24.5)                      | 12.6 (12.0, 13.3)            |
| 2014        | 16.8 (14.7, 19.1)            | 13.1 (11.8, 14.5)            | 20.6 (19.1, 22.1)                      | 11.9 (11.3, 12.5)            |
| 2015        | 17.8 (15.7, 20.0)            | 11.6 (10.4, 13.0)            | 20.7 (19.3, 22.1)                      | 11.6 (11.0, 12.2)            |
| 2016        | 16.3 (14.0, 18.8)            | 11.6 (10.3, 13.0)            | 17.9 (16.3, 19.6)                      | 11.2 (10.6, 11.8)            |
| 2017        | 13.6 (11.5, 16.0)            | 11.3 (9.8, 12.9)             | 17.0 (15.3, 18.8)                      | 10.9 (10.3, 11.5)            |
| 2018        | 18.2 (15.6, 21.1)            | 12.0 (10.6, 13.6)            | 18.9 (17.2, 20.8)                      | 10.8 (10.2, 11.4)            |

Abbreviation: CI, confidence interval.

**B. By Income-Level**

| Year | Asian,<br>% (95% CI) |                    | Black,<br>% (95% CI) |                    | Latino/Hispanic,<br>% (95% CI) |                    | White,<br>% (95% CI) |                    |
|------|----------------------|--------------------|----------------------|--------------------|--------------------------------|--------------------|----------------------|--------------------|
|      | Low income           | Middle/high income | Low income           | Middle/high income | Low income                     | Middle/high income | Low income           | Middle/high income |
| 1999 | 28.4 (21.2, 36.8)    | 17.7 (14.7, 21.2)  | 15.4 (13.3, 17.7)    | 12.9 (11.2, 14.7)  | 26.7 (24.4, 29.1)              | 17.5 (15.8, 19.3)  | 16.5 (15.3, 17.7)    | 12.2 (11.7, 12.8)  |
| 2000 | 19.9 (15.3, 25.5)    | 16.2 (13.1, 19.9)  | 16.1 (14.2, 18.2)    | 11.1 (9.6, 12.8)   | 28.1 (25.9, 30.5)              | 19.0 (17.0, 21.2)  | 15.2 (14.0, 16.5)    | 11.4 (10.8, 12.0)  |
| 2001 | 28.9 (22.8, 35.9)    | 16.2 (13.1, 19.9)  | 14.3 (12.6, 16.2)    | 10.6 (9.3, 12.2)   | 28.0 (26.1, 30.0)              | 17.3 (15.7, 19.1)  | 15.6 (14.4, 16.9)    | 11.9 (11.3, 12.5)  |
| 2002 | 26.0 (20.5, 32.4)    | 16.2 (13.5, 19.5)  | 15.1 (13.3, 17.1)    | 10.6 (9.1, 12.4)   | 27.0 (24.9, 29.3)              | 18.9 (17.0, 20.9)  | 15.0 (13.9, 16.2)    | 11.3 (10.7, 11.9)  |
| 2003 | 25.8 (19.3, 33.8)    | 18.2 (15.1, 21.8)  | 15.2 (13.3, 17.4)    | 9.2 (7.9, 10.7)    | 25.1 (23.1, 27.2)              | 15.7 (14.0, 17.5)  | 14.5 (13.4, 15.6)    | 10.6 (10.0, 11.2)  |
| 2004 | 24.8 (19.0, 31.6)    | 15.0 (12.0, 18.6)  | 14.8 (13.1, 16.6)    | 11.1 (9.7, 12.7)   | 30.0 (27.9, 32.3)              | 19.2 (17.2, 21.4)  | 15.0 (13.9, 16.1)    | 11.2 (10.7, 11.9)  |
| 2005 | 23.2 (17.8, 29.7)    | 16.4 (13.6, 19.7)  | 15.4 (13.7, 17.3)    | 12.2 (10.7, 13.9)  | 27.2 (25.4, 29.2)              | 18.1 (16.5, 20.0)  | 16.5 (15.2, 17.8)    | 10.5 (9.9, 11.1)   |
| 2006 | 20.1 (15.1, 26.4)    | 18.0 (15.0, 21.5)  | 17.2 (15.2, 19.5)    | 10.6 (9.0, 12.3)   | 29.6 (27.2, 32.1)              | 20.0 (17.3, 22.9)  | 16.3 (14.9, 17.9)    | 12.3 (11.5, 13.1)  |
| 2007 | 25.2 (19.3, 32.2)    | 19.8 (16.6, 23.4)  | 16.1 (14.1, 18.4)    | 10.9 (9.1, 12.9)   | 29.3 (26.7, 32.1)              | 16.7 (14.8, 18.8)  | 15.3 (13.8, 16.9)    | 11.4 (10.6, 12.2)  |
| 2008 | 24.6 (19.2, 31.1)    | 12.2 (10.0, 14.9)  | 17.5 (15.1, 20.1)    | 11.0 (9.4, 12.9)   | 27.1 (24.4, 30.1)              | 18.3 (16.4, 20.2)  | 16.2 (14.8, 17.8)    | 10.9 (10.2, 11.7)  |
| 2009 | 27.0 (21.8, 32.9)    | 18.6 (15.9, 21.6)  | 15.8 (13.8, 17.9)    | 11.2 (9.6, 12.9)   | 27.1 (24.9, 29.5)              | 16.1 (14.4, 18.0)  | 15.2 (13.8, 16.6)    | 10.8 (10.1, 11.5)  |
| 2010 | 27.9 (23.0, 33.3)    | 16.3 (13.8, 19.0)  | 17.2 (15.3, 19.4)    | 10.7 (9.3, 12.4)   | 27.3 (25.2, 29.5)              | 15.7 (14.0, 17.7)  | 17.2 (15.9, 18.7)    | 11.0 (10.3, 11.7)  |
| 2011 | 23.8 (20.3, 27.7)    | 16.5 (14.3, 19.0)  | 14.8 (13.1, 16.7)    | 10.9 (9.4, 12.7)   | 28.2 (26.1, 30.3)              | 17.2 (15.3, 19.2)  | 17.2 (16.0, 18.6)    | 10.5 (9.9, 11.1)   |
| 2012 | 22.8 (19.0, 27.1)    | 16.0 (13.9, 18.4)  | 15.8 (13.8, 18.1)    | 12.4 (10.8, 14.2)  | 27.5 (25.7, 29.4)              | 18.8 (16.9, 21.0)  | 16.7 (15.4, 18.1)    | 11.0 (10.4, 11.7)  |
| 2013 | 23.4 (19.8, 27.5)    | 16.1 (14.0, 18.3)  | 17.1 (15.4, 18.9)    | 12.0 (10.3, 13.9)  | 27.2 (25.2, 29.3)              | 18.6 (16.7, 20.7)  | 17.4 (16.1, 18.8)    | 11.0 (10.4, 11.7)  |
| 2014 | 20.5 (16.6, 25.1)    | 15.4 (13.1, 17.9)  | 16.1 (14.1, 18.2)    | 10.3 (8.7, 12.0)   | 25.1 (23.2, 27.1)              | 15.6 (13.7, 17.7)  | 15.4 (14.2, 16.7)    | 10.7 (10.1, 11.3)  |
| 2015 | 20.3 (16.1, 25.2)    | 16.9 (14.7, 19.3)  | 13.1 (11.1, 15.4)    | 10.5 (8.9, 12.2)   | 25.3 (23.2, 27.5)              | 16.4 (14.5, 18.6)  | 14.9 (13.7, 16.3)    | 10.5 (9.8, 11.1)   |
| 2016 | 17.6 (13.2, 23.1)    | 15.8 (13.2, 18.7)  | 15.5 (13.4, 17.9)    | 8.7 (7.2, 10.3)    | 20.5 (18.1, 23.2)              | 15.5 (13.6, 17.8)  | 14.5 (13.3, 15.7)    | 10.1 (9.5, 10.8)   |
| 2017 | 17.0 (13.1, 21.7)    | 12.4 (10.0, 15.3)  | 11.5 (9.3, 14.0)     | 11.1 (9.1, 13.4)   | 21.6 (18.9, 24.6)              | 13.4 (11.5, 15.6)  | 13.9 (12.6, 15.2)    | 10.0 (9.3, 10.7)   |
| 2018 | 20.7 (15.8, 26.5)    | 17.5 (14.5, 20.9)  | 14.7 (12.5, 17.2)    | 10.0 (8.2, 12.1)   | 22.4 (19.8, 25.2)              | 16.1 (14.1, 18.4)  | 14.9 (13.4, 16.4)    | 9.6 (9.0, 10.2)    |

Abbreviation: CI, confidence interval.

**eTable 12. Adjusted Annual Prevalence of Foregone or Delayed Medical Care Due to Cost by Race and Ethnicity, 1999-2018.**

**A. Overall**

| <b>Year</b> | <b>Asian,<br/>% (95% CI)</b> | <b>Black,<br/>% (95% CI)</b> | <b>Latino/Hispanic,<br/>% (95% CI)</b> | <b>White,<br/>% (95% CI)</b> |
|-------------|------------------------------|------------------------------|----------------------------------------|------------------------------|
| 1999        | 6.7 (5.0, 9.0)               | 13.6 (12.3, 15.1)            | 12.1 (11.0, 13.3)                      | 10.7 (10.2, 11.2)            |
| 2000        | 7.0 (5.2, 9.4)               | 13.8 (12.8, 15.0)            | 13.1 (12.0, 14.2)                      | 11.2 (10.7, 11.8)            |
| 2001        | 8.0 (6.4, 10.1)              | 14.0 (12.9, 15.3)            | 15.1 (13.9, 16.4)                      | 11.3 (10.8, 11.8)            |
| 2002        | 7.6 (5.9, 9.6)               | 16.9 (15.5, 18.3)            | 14.9 (13.7, 16.2)                      | 11.8 (11.3, 12.3)            |
| 2003        | 7.2 (5.2, 9.8)               | 15.7 (14.4, 17.1)            | 17.3 (15.9, 18.8)                      | 12.9 (12.3, 13.5)            |
| 2004        | 7.6 (5.8, 10.0)              | 18.2 (16.9, 19.5)            | 17.5 (16.3, 18.8)                      | 14.1 (13.5, 14.7)            |
| 2005        | 8.7 (6.4, 11.8)              | 17.7 (16.2, 19.2)            | 18.8 (17.5, 20.2)                      | 14.2 (13.6, 14.8)            |
| 2006        | 6.5 (5.0, 8.4)               | 19.0 (17.4, 20.6)            | 17.7 (16.2, 19.3)                      | 13.7 (13.0, 14.4)            |
| 2007        | 8.3 (6.5, 10.6)              | 17.1 (15.6, 18.6)            | 19.7 (18.1, 21.5)                      | 15.0 (14.3, 15.8)            |
| 2008        | 9.3 (7.3, 11.6)              | 21.0 (19.2, 22.8)            | 21.4 (19.8, 23.3)                      | 16.0 (15.2, 16.8)            |
| 2009        | 9.5 (7.6, 11.7)              | 21.9 (20.4, 23.6)            | 23.6 (21.9, 25.3)                      | 17.3 (16.6, 18.1)            |
| 2010        | 11.1 (9.3, 13.1)             | 23.2 (21.8, 24.7)            | 22.2 (20.7, 23.6)                      | 17.0 (16.3, 17.8)            |
| 2011        | 10.7 (9.2, 12.3)             | 22.0 (20.7, 23.5)            | 22.6 (21.2, 24.1)                      | 16.2 (15.5, 16.9)            |
| 2012        | 10.2 (8.7, 12.0)             | 20.7 (19.1, 22.3)            | 21.3 (19.9, 22.8)                      | 15.2 (14.6, 15.8)            |
| 2013        | 9.1 (7.7, 10.6)              | 19.0 (17.7, 20.4)            | 18.4 (17.1, 19.8)                      | 14.1 (13.5, 14.8)            |
| 2014        | 7.4 (6.0, 9.1)               | 18.7 (17.2, 20.3)            | 16.2 (15.0, 17.5)                      | 13.3 (12.6, 14.0)            |
| 2015        | 7.8 (6.3, 9.7)               | 16.4 (15.0, 17.9)            | 15.8 (14.5, 17.1)                      | 12.0 (11.4, 12.6)            |
| 2016        | 7.8 (6.2, 9.6)               | 15.3 (13.9, 16.8)            | 14.8 (13.3, 16.4)                      | 12.2 (11.6, 12.8)            |
| 2017        | 6.6 (5.2, 8.5)               | 15.0 (13.4, 16.8)            | 15.6 (13.9, 17.4)                      | 12.1 (11.4, 12.8)            |
| 2018        | 7.2 (5.8, 8.8)               | 16.9 (15.2, 18.6)            | 14.4 (13.1, 15.8)                      | 13.8 (13.1, 14.4)            |

Abbreviation: CI, confidence interval.

**B. By Income-Level**

| Year | Asian,<br>% (95% CI) |                    | Black,<br>% (95% CI) |                    | Latino/Hispanic,<br>% (95% CI) |                    | White,<br>% (95% CI) |                    |
|------|----------------------|--------------------|----------------------|--------------------|--------------------------------|--------------------|----------------------|--------------------|
|      | Low income           | Middle/high income | Low income           | Middle/high income | Low income                     | Middle/high income | Low income           | Middle/high income |
| 1999 | 12.3 (8.2, 18.0)     | 4.5 (3.1, 6.5)     | 21.0 (18.7, 23.4)    | 7.6 (6.4, 9.1)     | 15.9 (14.1, 17.7)              | 8.4 (7.2, 9.9)     | 21.1 (19.9, 22.4)    | 7.7 (7.3, 8.2)     |
| 2000 | 16.0 (11.0, 22.7)    | 3.6 (2.3, 5.5)     | 21.7 (19.8, 23.7)    | 7.6 (6.6, 8.9)     | 17.4 (15.7, 19.2)              | 8.6 (7.4, 10.0)    | 22.2 (20.9, 23.7)    | 7.9 (7.4, 8.4)     |
| 2001 | 15.9 (11.5, 21.7)    | 5.2 (3.6, 7.3)     | 20.5 (18.5, 22.7)    | 9.0 (7.8, 10.3)    | 19.2 (17.4, 21.2)              | 10.7 (9.3, 12.3)   | 23.6 (22.4, 25.0)    | 7.7 (7.3, 8.2)     |
| 2002 | 14.1 (10.0, 19.5)    | 4.8 (3.5, 6.6)     | 24.2 (21.9, 26.7)    | 11.3 (9.9, 12.9)   | 20.6 (18.7, 22.7)              | 9.8 (8.5, 11.2)    | 22.2 (20.9, 23.7)    | 8.6 (8.1, 9.1)     |
| 2003 | 14.5 (9.3, 21.4)     | 4.2 (2.8, 6.2)     | 23.9 (21.5, 26.4)    | 9.7 (8.4, 11.2)    | 22.0 (19.9, 24.3)              | 12.2 (10.7, 13.9)  | 25.0 (23.5, 26.5)    | 9.1 (8.5, 9.6)     |
| 2004 | 15.4 (10.9, 21.2)    | 4.4 (2.8, 6.9)     | 26.9 (24.7, 29.3)    | 11.3 (9.9, 12.8)   | 22.4 (20.6, 24.2)              | 12.1 (10.7, 13.7)  | 26.3 (24.8, 27.8)    | 10.2 (9.7, 10.8)   |
| 2005 | 14.0 (9.7, 19.7)     | 6.8 (4.3, 10.6)    | 26.4 (24.1, 28.9)    | 10.5 (9.0, 12.3)   | 24.4 (22.6, 26.3)              | 13.1 (11.4, 14.9)  | 26.6 (25.3, 28.0)    | 10.3 (9.7, 10.9)   |
| 2006 | 11.5 (8.5, 15.5)     | 4.6 (3.1, 6.7)     | 26.6 (24.1, 29.1)    | 12.5 (10.8, 14.4)  | 22.7 (20.7, 24.9)              | 12.5 (10.8, 14.4)  | 26.1 (24.4, 27.8)    | 9.5 (8.9, 10.2)    |
| 2007 | 12.8 (9.0, 17.9)     | 6.4 (4.6, 8.8)     | 24.6 (22.3, 27.0)    | 11.4 (9.7, 13.2)   | 25.7 (23.4, 28.1)              | 14.0 (12.0, 16.2)  | 28.4 (26.5, 30.4)    | 10.9 (10.2, 11.7)  |
| 2008 | 16.3 (11.4, 22.9)    | 6.5 (4.9, 8.7)     | 28.9 (26.1, 31.9)    | 15.3 (13.2, 17.7)  | 27.8 (25.0, 30.7)              | 15.7 (13.6, 18.0)  | 29.0 (27.3, 30.9)    | 12.0 (11.2, 12.8)  |
| 2009 | 17.9 (13.9, 22.8)    | 6.4 (4.6, 8.9)     | 28.3 (25.8, 30.9)    | 17.0 (15.1, 19.2)  | 29.3 (26.9, 31.8)              | 17.7 (15.4, 20.2)  | 29.4 (27.7, 31.1)    | 13.5 (12.7, 14.3)  |
| 2010 | 17.8 (13.9, 22.5)    | 8.2 (6.4, 10.4)    | 31.3 (29.1, 33.7)    | 16.1 (14.2, 18.1)  | 28.5 (26.5, 30.6)              | 15.3 (13.6, 17.1)  | 30.1 (28.6, 31.6)    | 12.5 (11.8, 13.3)  |
| 2011 | 17.3 (14.5, 20.5)    | 7.5 (5.9, 9.5)     | 30.5 (28.5, 32.6)    | 14.9 (13.3, 16.7)  | 29.2 (27.1, 31.4)              | 15.0 (13.3, 16.8)  | 30.7 (29.2, 32.3)    | 11.2 (10.5, 11.9)  |
| 2012 | 19.8 (15.9, 24.3)    | 6.0 (4.7, 7.7)     | 29.7 (27.4, 32.1)    | 12.7 (11.0, 14.6)  | 26.4 (24.4, 28.5)              | 15.2 (13.5, 17.1)  | 29.3 (27.7, 30.9)    | 10.2 (9.6, 10.9)   |
| 2013 | 18.8 (15.4, 22.7)    | 4.9 (3.7, 6.4)     | 27.0 (25.0, 29.0)    | 12.0 (10.5, 13.5)  | 24.8 (22.9, 26.9)              | 11.7 (10.3, 13.4)  | 26.5 (24.9, 28.2)    | 9.9 (9.2, 10.6)    |
| 2014 | 15.1 (12.1, 18.7)    | 4.4 (2.9, 6.4)     | 24.2 (22.1, 26.5)    | 13.6 (11.7, 15.9)  | 21.5 (19.7, 23.4)              | 10.5 (9.1, 12.1)   | 25.0 (23.3, 26.7)    | 9.5 (8.8, 10.2)    |
| 2015 | 15.0 (11.4, 19.4)    | 5.3 (3.8, 7.3)     | 21.7 (19.6, 23.9)    | 12.4 (10.8, 14.3)  | 21.5 (19.8, 23.4)              | 10.1 (8.6, 11.7)   | 22.2 (20.7, 23.8)    | 8.8 (8.2, 9.4)     |
| 2016 | 14.0 (10.0, 19.2)    | 5.5 (4.0, 7.4)     | 22.0 (19.6, 24.5)    | 10.4 (8.6, 12.4)   | 19.0 (16.8, 21.4)              | 11.0 (9.3, 13.1)   | 22.4 (21.0, 24.0)    | 9.1 (8.5, 9.7)     |
| 2017 | 10.2 (7.5, 13.8)     | 5.3 (3.7, 7.4)     | 19.8 (17.4, 22.5)    | 11.5 (9.5, 13.8)   | 20.6 (18.1, 23.2)              | 11.1 (9.3, 13.2)   | 21.6 (20.1, 23.3)    | 9.4 (8.8, 10.0)    |
| 2018 | 10.2 (7.3, 14.1)     | 5.9 (4.6, 7.7)     | 21.6 (19.2, 24.3)    | 13.4 (11.3, 15.8)  | 18.7 (16.6, 21.0)              | 10.6 (9.0, 12.5)   | 24.7 (23.0, 26.3)    | 10.8 (10.1, 11.5)  |

Abbreviation: CI, confidence interval.

**eTable 13. Adjusted Trends in the Prevalence and Racial/Ethnic Differences of Health Care Access, Utilization, and Affordability Measures by Race and Ethnicity, Using Autoregressive Model, 1999–2018.**

| <b>Outcome</b>                                                   | <b>Asian<br/>Percentage points<sup>b, c</sup><br/>(95% CI), p value</b> | <b>Black<br/>Percentage points<sup>b, c</sup> (95%<br/>CI), p value</b> | <b>Latino/Hispanic<br/>Percentage points<sup>b, c</sup> (95%<br/>CI), p value</b> | <b>White<br/>Percentage points<sup>b, c</sup> (95%<br/>CI), p value</b> |
|------------------------------------------------------------------|-------------------------------------------------------------------------|-------------------------------------------------------------------------|-----------------------------------------------------------------------------------|-------------------------------------------------------------------------|
| <b>Lack of Health Insurance<br/>When Interviewed<sup>a</sup></b> |                                                                         |                                                                         |                                                                                   |                                                                         |
| 1999-2009                                                        |                                                                         |                                                                         |                                                                                   |                                                                         |
| Annualized rate of change<br>in prevalence                       | 0.00 (-0.63, +0.64), 0.99                                               | +0.33 (-0.26, +0.91), 0.27                                              | +0.53 (-0.12, +1.17), 0.11                                                        | +0.27 (-0.03, +0.57), 0.08                                              |
| Annualized rate of change<br>in difference with White            | -0.31 (-0.56, -0.06), 0.01                                              | +0.04 (-0.20, +0.29), 0.73                                              | +0.21 (-0.15, +0.56), 0.26                                                        | –                                                                       |
| 2010-2015                                                        |                                                                         |                                                                         |                                                                                   |                                                                         |
| Annualized rate of change<br>in prevalence                       | -1.13 (-1.82, -0.44), 0.001                                             | -1.10 (-1.81, -0.38), 0.003                                             | -1.93 (-2.76, -1.10), <0.001                                                      | -0.79 (-1.15, -0.44), <0.001                                            |
| Annualized rate of change<br>in difference with White            | -0.27 (-0.61, +0.07), 0.12                                              | -0.28 (-0.62, +0.06), 0.11                                              | -1.10 (-1.68, -0.52), <0.001                                                      | –                                                                       |
| 2016-2018                                                        |                                                                         |                                                                         |                                                                                   |                                                                         |
| Annualized rate of change<br>in prevalence                       | -0.69 (-3.30, +1.92), 0.61                                              | -0.48 (-3.72, +2.75), 0.77                                              | -1.15 (-4.84, +2.54), 0.54                                                        | -0.18 (-1.03, +0.68), 0.69                                              |
| Annualized rate of change<br>in difference with White            | -0.66 (-2.56, +1.24), 0.50                                              | -0.34 (-3.20, +2.52), 0.81                                              | -1.04 (-4.16, +2.07), 0.51                                                        | –                                                                       |
| <b>No Usual Source of Care<br/>When Interviewed<sup>a</sup></b>  |                                                                         |                                                                         |                                                                                   |                                                                         |
| 1999-2009                                                        |                                                                         |                                                                         |                                                                                   |                                                                         |
| Annualized rate of change<br>in prevalence                       | -0.13 (-0.35, +0.1), 0.26                                               | +0.28 (-0.07, +0.63), 0.11                                              | +0.27 (-0.07, +0.61), 0.12                                                        | +0.16 (+0.05, +2.62), 0.004                                             |
| Annualized rate of change<br>in difference with White            | -0.28 (-0.49, -0.07), 0.008                                             | +0.18 (+0.05, +0.31), 0.005                                             | +0.10 (-0.08, +2.83), 0.27                                                        | –                                                                       |
| 2010-2015                                                        |                                                                         |                                                                         |                                                                                   |                                                                         |
| Annualized rate of change<br>in prevalence                       | -0.01 (-0.92, +0.89), 0.98                                              | -0.37 (-1.32, +0.59), 0.45                                              | -1.04 (-1.49, -0.58), <0.001                                                      | -0.12 (-0.40, +0.16), 0.39                                              |
| Annualized rate of change<br>in difference with White            | +0.11 (-0.54, +0.78), 0.72                                              | -0.22 (-0.48, +0.05), 0.10                                              | -0.91 (-1.31, -0.52), <0.001                                                      | –                                                                       |
| 2016-2018                                                        |                                                                         |                                                                         |                                                                                   |                                                                         |

| <b>Outcome</b>                                                                        | <b>Asian<br/>Percentage points<sup>b, c</sup><br/>(95% CI), p value</b> | <b>Black<br/>Percentage points<sup>b, c</sup> (95%<br/>CI), p value</b> | <b>Latino/Hispanic<br/>Percentage points<sup>b, c</sup> (95%<br/>CI), p value</b> | <b>White<br/>Percentage points<sup>b, c</sup> (95%<br/>CI), p value</b> |
|---------------------------------------------------------------------------------------|-------------------------------------------------------------------------|-------------------------------------------------------------------------|-----------------------------------------------------------------------------------|-------------------------------------------------------------------------|
| Annualized rate of change in prevalence                                               | -0.73 (-4.0, +2.58), 0.66                                               | +0.29 (-1.35, +1.94), 0.73                                              | -0.30 (-2.09, +1.48), 0.74                                                        | -0.07 (-0.85, +0.72), 0.86                                              |
| Annualized rate of change in difference with White                                    | -0.68 (-4.1, +2.75), 0.70                                               | +0.16 (-0.54, +0.85), 0.66                                              | -0.22 (-2.61, +2.17), 0.29                                                        | –                                                                       |
| <b>Not Seen or Talked to a Health Professional in the Past 12 Months<sup>a</sup></b>  |                                                                         |                                                                         |                                                                                   |                                                                         |
| 1999-2009                                                                             |                                                                         |                                                                         |                                                                                   |                                                                         |
| Annualized rate of change in prevalence                                               | +0.04 (-0.13, +0.22), 0.64                                              | +0.06 (-0.14, +0.24), 0.57                                              | +0.05 (-0.23, +0.32), 0.74                                                        | -0.03 (-0.11, +0.56), 0.50                                              |
| Annualized rate of change in difference with White                                    | +0.01 (-0.11, +0.22), 0.51                                              | +0.11 (+0.01, +0.21), 0.03                                              | +0.07 (-0.11, +0.25), 0.44                                                        | –                                                                       |
| 2010-2015                                                                             |                                                                         |                                                                         |                                                                                   |                                                                         |
| Annualized rate of change in prevalence                                               | -0.35 (-0.78, +0.07), 0.10                                              | -0.21 (-0.55, +0.19), 0.34                                              | -0.41 (-0.92, +0.10), 0.12                                                        | -0.06 (-0.25, +0.13), 0.52                                              |
| Annualized rate of change in difference with White                                    | -0.29 (-0.59, +0.01), 0.06                                              | -0.10 (-0.27, +0.08), 0.27                                              | -0.34 (-0.75, +0.07), 0.10                                                        | –                                                                       |
| 2016-2018                                                                             |                                                                         |                                                                         |                                                                                   |                                                                         |
| Annualized rate of change in prevalence                                               | -0.58 (-1.81, +0.64), 0.35                                              | -0.21 (-1.04, +0.62), 0.62                                              | -1.10 (-2.38, +0.17), 0.09                                                        | -0.44 (-1.11, +0.23), 0.20                                              |
| Annualized rate of change in difference with White                                    | -0.08 (-1.01, +0.9), 0.87                                               | +0.06 (-0.45, +0.56), 0.83                                              | -0.69 (-1.69, +0.32), 0.18                                                        | –                                                                       |
| <b>Foregone or Delayed Medical Care Due to Cost in the Past 12 Months<sup>a</sup></b> |                                                                         |                                                                         |                                                                                   |                                                                         |
| 1999-2009                                                                             |                                                                         |                                                                         |                                                                                   |                                                                         |
| Annualized rate of change in prevalence                                               | +0.33 (0.00, +0.66), 0.05                                               | +0.92 (+0.62, +1.22), <0.001                                            | +1.12 (+0.79, +1.45), <0.001                                                      | +0.68 (+0.51, +0.85), <0.001                                            |
| Annualized rate of change in difference with White                                    | -0.35 (-0.48, -0.22), <0.001                                            | +0.24 (+0.09, +0.39), 0.002                                             | +0.42 (+0.28, +0.56), <0.001                                                      | –                                                                       |
| 2010-2015                                                                             |                                                                         |                                                                         |                                                                                   |                                                                         |
| Annualized rate of change in prevalence                                               | -0.27 (-0.70, +0.17), 0.23                                              | -0.84 (-1.37, -0.31), 0.002                                             | -1.19 (-1.68, -0.69), <0.001                                                      | -0.82 (-1.3, -0.38), <0.001                                             |

|                                                                                                                                                                                                                                                                                                                                                                                                                                                                                                                                                                                                                           |                                                                         |                                                                         |                                                                                   |                                                                         |
|---------------------------------------------------------------------------------------------------------------------------------------------------------------------------------------------------------------------------------------------------------------------------------------------------------------------------------------------------------------------------------------------------------------------------------------------------------------------------------------------------------------------------------------------------------------------------------------------------------------------------|-------------------------------------------------------------------------|-------------------------------------------------------------------------|-----------------------------------------------------------------------------------|-------------------------------------------------------------------------|
| Annualized rate of change in difference with White                                                                                                                                                                                                                                                                                                                                                                                                                                                                                                                                                                        | +0.53 (+0.32, +0.73), <0.001                                            | -0.03 (-0.30, +0.23), 0.81                                              | -0.40 (-0.65, -0.15), 0.002                                                       | –                                                                       |
| 2016-2018                                                                                                                                                                                                                                                                                                                                                                                                                                                                                                                                                                                                                 |                                                                         |                                                                         |                                                                                   |                                                                         |
| <b>Outcome</b>                                                                                                                                                                                                                                                                                                                                                                                                                                                                                                                                                                                                            | <b>Asian<br/>Percentage points<sup>b, c</sup><br/>(95% CI), p value</b> | <b>Black<br/>Percentage points<sup>b, c</sup> (95%<br/>CI), p value</b> | <b>Latino/Hispanic<br/>Percentage points<sup>b, c</sup> (95%<br/>CI), p value</b> | <b>White<br/>Percentage points<sup>b, c</sup> (95%<br/>CI), p value</b> |
| Annualized rate of change in prevalence                                                                                                                                                                                                                                                                                                                                                                                                                                                                                                                                                                                   | -0.41 (-1.49, +0.67), 0.46                                              | -0.38 (-1.76, +0.99), 0.59                                              | -0.51 (-0.18, +0.75), 0.43                                                        | +0.44 (-0.54, +1.4), 0.38                                               |
| Annualized rate of change in difference with White                                                                                                                                                                                                                                                                                                                                                                                                                                                                                                                                                                        | -0.75 (-1.78, +0.28), 0.15                                              | -0.82 (-1.67, +0.03), 0.06                                              | -0.73 (-1.24, -0.23), 0.004                                                       | N/A                                                                     |
| Abbreviations: CI, confidence interval                                                                                                                                                                                                                                                                                                                                                                                                                                                                                                                                                                                    |                                                                         |                                                                         |                                                                                   |                                                                         |
| <sup>a</sup> For these measures, rather than assuming a monotonic relationship between time and measure rates, time was modelled as a linear spline with knots at 2010 and 2016 to reflect the observed inflection points of unmet medical needs due to cost and health insurance coverage                                                                                                                                                                                                                                                                                                                                |                                                                         |                                                                         |                                                                                   |                                                                         |
| <sup>b</sup> For annualized rate of change in the prevalence and change in difference with White: a positive sign (+) means the prevalence of such a measure (or its difference with White people) increased, and a negative sign (-) means it decreased. For all measures, a decrease in prevalence (negative sign) is a socially positive result (i.e., increased percentage of people with insurance coverage, increased percentage of people with a usual source of care, increased percentage of people with recent health care utilization, and reduced percentage of people with unmet medical needs due to cost). |                                                                         |                                                                         |                                                                                   |                                                                         |
| <sup>c</sup> Percentage point estimates are adjusted for age, sex, and US region.                                                                                                                                                                                                                                                                                                                                                                                                                                                                                                                                         |                                                                         |                                                                         |                                                                                   |                                                                         |

## eReferences

1. Centers for Disease Control and Prevention. National Health Interview Survey, 1997-2018. Survey description document. <https://www.cdc.gov/nchs/nhis/1997-2018.htm>. Accessed January 4, 2021.
2. Idler EL, Benyamini Y. Self-rated health and mortality: a review of twenty-seven community studies. *J Health Soc Behav.* 1997;38(1):21-37.
3. Kessler RC, Barker PR, Colpe LJ, et al. Screening for serious mental illness in the general population. *Arch Gen Psychiatry.* 2003;60(2):184-189.
4. Nagi SZ. An epidemiology of disability among adults in the United States. *Milbank Mem Fund Q Health Soc.* 1976;54(4):439-467.
5. Nagi SZ, Marsh J. Disability, health status, and utilization of health services. *Int J Health Serv.* 1980;10(4):657-676.
6. Nagi SZ. Some conceptual issues in disability and rehabilitation. In: Sussman MB, Ed. *Sociology and Rehabilitation.* Washington, DC: American Sociological Association; 1965:100-113.
7. Altman BM, Bernstein A. *Disability and health in the United States, 2001-2005.* Hyattsville, MD: National Center for Health Statistics. 2008.
8. Egede LE. Diabetes, major depression, and functional disability among U.S. adults. *Diabetes Care.* 2004;27(2):421-428.
9. Holmes J, Powell-Griner E, Lethbridge-Cejku M, Heyman K. Aging differently: physical limitations among adults aged 50 years and over: United States, 2001-2007. *NCHS Data Brief.* 2009(20):1-8.
10. Ryerson B, Tierney EF, Thompson TJ, et al. Excess physical limitations among adults with diabetes in the U.S. population, 1997-1999. *Diabetes Care.* 2003;26(1):206-210.
11. Minkler M, Fuller-Thomson E, Guralnik JM. Gradient of disability across the socioeconomic spectrum in the United States. *N Engl J Med.* 2006;355(7):695-703.
12. Lubitz J, Cai L, Kramarow E, Lentzner H. Health, life expectancy, and health care spending among the elderly. *N Engl J Med.* 2003;349(11):1048-1055.
13. Perissinotto CM, Stijacic Cenzer I, Covinsky KE. Loneliness in older persons: a predictor of functional decline and death. *Arch Intern Med.* 2012;172(14):1078-1084.
14. Jette AM, Branch LG. The Framingham Disability Study: II. physical disability among the aging. *Am J Public Health.* 1981;71(11):1211-1216.
15. Murabito JM, Pencina MJ, Zhu L, Kelly-Hayes M, Shrader P, D'Agostino RB, Sr. Temporal trends in self-reported functional limitations and physical disability among the community-dwelling elderly population: the Framingham Heart Study. *Am J Public Health.* 2008;98(7):1256-1262.
16. Rist PM, Buring JE, Cook NR, Manson JE, Rexrode KM. Effect of vitamin D and/or omega-3 fatty acid supplementation on stroke outcomes: a randomized trial. *Eur J Neurol.* 2021;28(3):809-815.
17. Louie GH, Ward MM. Socioeconomic and ethnic differences in disease burden and disparities in physical function in older adults. *Am J Public Health.* 2011;101(7):1322-1329.
18. National Center for Health Statistics. Evaluation and editing of health insurance data, National Health Interview Survey. [https://www.cdc.gov/nchs/nhis/health\\_insurance/hi\\_eval.htm](https://www.cdc.gov/nchs/nhis/health_insurance/hi_eval.htm). Accessed January 4, 2021.
19. Martinez ME, Ward BW, Adams PF. Health care access and utilization among adults aged 18-64, by race and Hispanic origin: United States, 2013 and 2014. *NCHS Data Brief.* 2015(208):1-8.
20. Villarroel MA, Cohen RA. Health insurance continuity and health care access and utilization, 2014. *NCHS Data Brief.* 2016(249):1-8.
21. Terlizzi EP, Cohen RA. Differences in select measures of health care access, utilization, and financial burden by urbanicity, 2017. *Natl Health Stat Report.* 2019(134):1-13.
22. Martinez ME, Ward BW. Health care access and utilization among adults aged 18-64, by poverty level: United States, 2013-2015. *NCHS Data Brief.* 2016(262):1-8.
23. Cohen RA, Bloom B. Access to and utilization of medical care for young adults ages 20-29 years: United States, 2008. *NCHS Data Brief.* 2010(29):1-8.
